# Supplementary material for: Linking germline telomere removal to global programmed DNA elimination in Tetrahymena genome differentiation
Source: eLife. 2026 Jul 14;15:RP109351. doi: 10.7554/eLife.109351 (PMC13368176; doi:10.7554/eLife.109351)
Supplement: Supplementary file 2. [file elife-109351-supp2.xlsx]

## Sheet: Sheet1
Probes for 4R-MLS (5'-3')	Probes for 4R-MDS (5'-3')	Probes for 3L-MLS (5'-3')
CCTCCTAAGTTTCGAGCTGGACTCAGTGTCTGCGCCCTCATGGGGTTGCTGGCCCTTGATC	TTACACTCGGACCTCGTCGACATGCATTCTTAGGAGCGTCGCCTTCATTACCCTCGCCAG	CCTCCTAAGTTTCGAGCTGGACTCAGTGTGCGCTACGCTCCCGGCAAGTGCCATACTGCCG
CCTCCTAAGTTTCGAGCTGGACTCAGTGTTGGCGTACCTCAGGGGTCAGCTACTTCACCAG	TTACACTCGGACCTCGTCGACATGCATTAAGCCTCTCGCCAACCTCCCTGAACAGGAAGC	CCTCCTAAGTTTCGAGCTGGACTCAGTGTGCAGCCGGCCTAGCCCTACCTGCCTGAAAACC
CCTCCTAAGTTTCGAGCTGGACTCAGTGTGGTGCCCTAACTGCAGGTCGAAGATACGCTCC	TTACACTCGGACCTCGTCGACATGCATTCACATCGAGAGCATCTCTGGGCGCTCAGGTGA	CCTCCTAAGTTTCGAGCTGGACTCAGTGTTGCGCCACCCATTACGGGCTTCCCTATCCCCC
CCTCCTAAGTTTCGAGCTGGACTCAGTGTGCAGGTGGAAACCTGCTTATGGCAGAGGGGCT	TTACACTCGGACCTCGTCGACATGCATTAGGAGGTCGTTGTCCTCCTCAACGTGGTCTCG	CCTCCTAAGTTTCGAGCTGGACTCAGTGTCTGGGCTGGTACCTTCCTTTCCTGTCCTGGGG
CCTCCTAAGTTTCGAGCTGGACTCAGTGTCCGCCCACTCAACAATAGGTAGAGGAGGCACC	TTACACTCGGACCTCGTCGACATGCATTGAAGCTGGAGCCTACCATAGCTTCGACTGTCC	CCTCCTAAGTTTCGAGCTGGACTCAGTGTCTCTCCTTAGGCGCGCAGTCTCTGCCTAGCTC
CCTCCTAAGTTTCGAGCTGGACTCAGTGTACCCCTCTGCCATACGCAAGTATGCACCTGCC	TTACACTCGGACCTCGTCGACATGCATTTCGGAAGGGAGTGGGCTTAGCTTACAGCCTTG	CCTCCTAAGTTTCGAGCTGGACTCAGTGTCCAGCTCAAGTGCTCTCCCTCACCCAGCTCTC
CCTCCTAAGTTTCGAGCTGGACTCAGTGTGGCCATGCTGGAGCGAGTTGCCAACAAGGAGA	TTACACTCGGACCTCGTCGACATGCATTGCCAGAAAAGCAGCCAAAAGCGAGGATCGCAG	CCTCCTAAGTTTCGAGCTGGACTCAGTGTCAGGCATTCCTCCCCAGACAAACTCCCCCGCT
CCTCCTAAGTTTCGAGCTGGACTCAGTGTGCTGCTGTAAGACAGAGTGGTTGCGCTGACGC	TTACACTCGGACCTCGTCGACATGCATTCTGCATGTCCATTCAAAGAGTGGTGGGTGGGG	CCTCCTAAGTTTCGAGCTGGACTCAGTGTGTAAGCAGGATGCCGTGGCCGTGATTCTGTCG
CCTCCTAAGTTTCGAGCTGGACTCAGTGTGTACTCTATGAGTTTGGGAGGGGAGTGGGGGG	TTACACTCGGACCTCGTCGACATGCATTCTGATAGGAGGAGTCAGCGGACTTCTTGGTGC	CCTCCTAAGTTTCGAGCTGGACTCAGTGTGGCCTGCATCACGCGCGATAGCATTGAGCCTA
CCTCCTAAGTTTCGAGCTGGACTCAGTGTGTGAGGCACCAGCAGAGATTAGTCCAGAGTGC	TTACACTCGGACCTCGTCGACATGCATTCCAGCACCGAGGAATCCGTTACTAGTTGGGCA	CCTCCTAAGTTTCGAGCTGGACTCAGTGTTGGAACGCGGCATGTTACCTAGGTGGGAGAGC
CCTCCTAAGTTTCGAGCTGGACTCAGTGTAACACCCGCAAGAGCTAACTGTATGGGCTGCG	TTACACTCGGACCTCGTCGACATGCATTGAGCCACCCTCGGAGGTTGCAAAGCTTTAAGC	CCTCCTAAGTTTCGAGCTGGACTCAGTGTAGCAGGTGGATACCTGCGTATGGCAGAAGGGC
CCTCCTAAGTTTCGAGCTGGACTCAGTGTGGCCCTCAACCGACTTACCTAATGACAGCACC	TTACACTCGGACCTCGTCGACATGCATTGGGCGTTTGCGCATTTATCACAAGCGTGGCGA	CCTCCTAAGTTTCGAGCTGGACTCAGTGTAGGATAGGCCCAATAACGGGTGGCGCATTGCC
CCTCCTAAGTTTCGAGCTGGACTCAGTGTGCTCCAGAAGCTGCGCTAACAGCTGTCTCTAG	TTACACTCGGACCTCGTCGACATGCATTGTGCAATGACGGATGGTGGGTGAGGGTTTTAC	CCTCCTAAGTTTCGAGCTGGACTCAGTGTGGGTTGCATCAAGGCTCCAGCCTAAGCCCTTC
CCTCCTAAGTTTCGAGCTGGACTCAGTGTGGAAGGAAGGAGAGCCCATTTGTGTGGCTGAG	TTACACTCGGACCTCGTCGACATGCATTGAAGGGTGCTCGCCAAGGACCATCATCTTTGT	CCTCCTAAGTTTCGAGCTGGACTCAGTGTGGGCTACTGTGGTTGCTGCTGCTACTGCTGCT
CCTCCTAAGTTTCGAGCTGGACTCAGTGTCCTGCTTCGATTGCTGCTGCTTTCTTCTGGGC	TTACACTCGGACCTCGTCGACATGCATTGCAGTGTTGAGCTTGAGGTTTACGCCTCCGAT	CCTCCTAAGTTTCGAGCTGGACTCAGTGTGCTTGACCACCTGCCTGACCACTTGCGTAACC
CCTCCTAAGTTTCGAGCTGGACTCAGTGTGACAGTTGTAAACGGGGCGCCTATAGAGGGTG	TTACACTCGGACCTCGTCGACATGCATTTACGGTACTGGTGCTGTCAAGGGAACTGTTGC	CCTCCTAAGTTTCGAGCTGGACTCAGTGTTCCTCCTCCTCCTCTCCTCCTCGAAGAAGAAG
CCTCCTAAGTTTCGAGCTGGACTCAGTGTCCTCCTTTAGGGAGCACTACTTACCCCTTGGC	TTACACTCGGACCTCGTCGACATGCATTGACAAACTGTCAGCAGTTCCTGCGAGAATGGG	CCTCCTAAGTTTCGAGCTGGACTCAGTGTGCCCTTTCACTCTCAACGGTCGTCTGCTATGC
CCTCCTAAGTTTCGAGCTGGACTCAGTGTAACCCCACCTAGAGGGCAGTGTGGAATCTGCT	TTACACTCGGACCTCGTCGACATGCATTGCTTGCACTGCATCTTGAAGAGCTGGACTCTC	CCTCCTAAGTTTCGAGCTGGACTCAGTGTAGAGGCAGAGCTAGCTGCCATTTTCGCCTCAG
CCTCCTAAGTTTCGAGCTGGACTCAGTGTGGCCCGATAGCATGCAGCATTACGAATACGGC	TTACACTCGGACCTCGTCGACATGCATTCCAGTTACATCTCCAACCCCCACATGGGATGT	CCTCCTAAGTTTCGAGCTGGACTCAGTGTACGGGACGGCACCCTCTCTTAAGCGTTAAAGG
CCTCCTAAGTTTCGAGCTGGACTCAGTGTCTTCCTTCTCAGCCTCTACTCCCGTTTGCCTC	TTACACTCGGACCTCGTCGACATGCATTGGCTTGCAATGGGCGGTAGAAGCTATGATTGG	CCTCCTAAGTTTCGAGCTGGACTCAGTGTGAAGTGTGGCGGGCACCTCTTAATGCTATCGG
CCTCCTAAGTTTCGAGCTGGACTCAGTGTCCGTTCGGAACTGGATTAATAGTCGCTCTGCG	TTACACTCGGACCTCGTCGACATGCATTGTTCCACCCTCTACACTGGCGCATTTAGGTTC	CCTCCTAAGTTTCGAGCTGGACTCAGTGTGTGTAAAGAACCGCCTTAGACGCGCTAGGTGC
CCTCCTAAGTTTCGAGCTGGACTCAGTGTCGAGGAAGCCTCACTGGAAGATCAACGTATCC	TTACACTCGGACCTCGTCGACATGCATTTGTCATAAGTGGGCAGAAGGGCTTGTCGTTGG	CCTCCTAAGTTTCGAGCTGGACTCAGTGTAGGCTCTGAAGCTTAATGGGCAGCAAGCCGTC
CCTCCTAAGTTTCGAGCTGGACTCAGTGTGCACCAACTCCTCTTTGCTGTGGTAGGACAAG	TTACACTCGGACCTCGTCGACATGCATTGAGTTAGCCTCCTTCTACCTGCTGGTAGTGTC	CCTCCTAAGTTTCGAGCTGGACTCAGTGTTGGAAGCCTTCACTTGCTGCAGCCTTTGCGGT
CCTCCTAAGTTTCGAGCTGGACTCAGTGTCCCTGGGTTTTGAAAGGCAGAAGCTCAACCCA	TTACACTCGGACCTCGTCGACATGCATTGCGTTAGCCGATGCATATGTGAGAGGTAGTCC	CCTCCTAAGTTTCGAGCTGGACTCAGTGTATGGGGAGAGAATAGAGCCCTGATGGAGGCCA
CCTCCTAAGTTTCGAGCTGGACTCAGTGTCCCCATCAACCATGCTGGTTATGAAGGCCTTG	TTACACTCGGACCTCGTCGACATGCATTCTCTCCCACCTTCTGATTCGACACGCAAAGCT	CCTCCTAAGTTTCGAGCTGGACTCAGTGTCTCGCGCAGCCACAAAATGGAGGACGAAAGCT
CCTCCTAAGTTTCGAGCTGGACTCAGTGTTATTGCGAACAGCGAGCATGTTCGCAAGGGGA	TTACACTCGGACCTCGTCGACATGCATTATCGTTAGCTTCAGTCACTGCACGTTCGGGTG	CCTCCTAAGTTTCGAGCTGGACTCAGTGTCGGCGAAGAGCTCAAAGCGGTGATCTTGATGG
CCTCCTAAGTTTCGAGCTGGACTCAGTGTAGTCATGCGAAGAGCCGAGAGGATGTTTTCCC	TTACACTCGGACCTCGTCGACATGCATTACAGCGCTCGCAAGTGGAACAATGGTGTGATC	CCTCCTAAGTTTCGAGCTGGACTCAGTGTGACCCTCCTTTATCTCCCACTCCACTACCTCC
CCTCCTAAGTTTCGAGCTGGACTCAGTGTGGGGTTAATGGGGTTCGTGTTGGTGTTGGTGT	TTACACTCGGACCTCGTCGACATGCATTGTCCTGCCTACATATGGAGATAGCACAGCCGT	CCTCCTAAGTTTCGAGCTGGACTCAGTGTCTCCAGGCCGTCCTGAGGGGGTTAAATTTACT
CCTCCTAAGTTTCGAGCTGGACTCAGTGTGAGAAGTCCTGACAAGGAGGTGCAATGCCAAG	TTACACTCGGACCTCGTCGACATGCATTCCACTCTCAAATGACTCTAACGCACCTGCGCT	CCTCCTAAGTTTCGAGCTGGACTCAGTGTCACGAAATGCTCTCTTGAAGCGCAGTGCGCAA
CCTCCTAAGTTTCGAGCTGGACTCAGTGTACCTGACTCAGTTGCTCAGGCTCTACACTCTG	TTACACTCGGACCTCGTCGACATGCATTCTCCTGAATATGGTGAGGATCTCCCCATTGCC	CCTCCTAAGTTTCGAGCTGGACTCAGTGTGATCAAGGCTCTCGGAGCATACGTGACAAGCA
CCTCCTAAGTTTCGAGCTGGACTCAGTGTTGCTTCTGGCTCAATAGCTCAAGCCAAGAGGC	TTACACTCGGACCTCGTCGACATGCATTCCCAATGAAATCTGTGCGTATGGTCCTAGCCC	CCTCCTAAGTTTCGAGCTGGACTCAGTGTAGGGGAAAAACTAGAGTGCACACTGATGGGGC
CCTCCTAAGTTTCGAGCTGGACTCAGTGTTGCTCTGAAGCCATACCGCCTTCTCATACAGC	TTACACTCGGACCTCGTCGACATGCATTCATACGGCTTCTCCTTTTCCATAGCAGGTGCC	CCTCCTAAGTTTCGAGCTGGACTCAGTGTATCCTCTGGTTAGCGTGCGCAATTATTGCGCG
CCTCCTAAGTTTCGAGCTGGACTCAGTGTCCTTCAGCATTCAGCAGAAAGCTCAGGAAGCC	TTACACTCGGACCTCGTCGACATGCATTCATGTCCTGCTAGATAGCCAGAAGCACCAGTC	CCTCCTAAGTTTCGAGCTGGACTCAGTGTCTTCTTCTTCTTCTGAGGATGGGAGAGGGAGG
CCTCCTAAGTTTCGAGCTGGACTCAGTGTCTATGCCATAGCGAACCTTGTCGAAGTAGGCC	TTACACTCGGACCTCGTCGACATGCATTACCAAAGCCAGCCGTGCTGTCTATCGTCAAAG	CCTCCTAAGTTTCGAGCTGGACTCAGTGTGGCGGCAGGTCCACCTTACCTTATAAGGGTTT
CCTCCTAAGTTTCGAGCTGGACTCAGTGTCTAGACTAAAAGGGTGGCATGGTGGAGTCGCA	TTACACTCGGACCTCGTCGACATGCATTGCAGTCCTAGAGAGCTAACAGTCATCACGCCA	CCTCCTAAGTTTCGAGCTGGACTCAGTGTATATCCACATATTCAGCTGTGCCCCCAGGGCA
CCTCCTAAGTTTCGAGCTGGACTCAGTGTTGGAAGACACAGAGCTGCTTGATTAAGGGCGG	TTACACTCGGACCTCGTCGACATGCATTTGCTCACAACATCTACTGCAGCTGCACCCAAG	CCTCCTAAGTTTCGAGCTGGACTCAGTGTTTTTGGCGATGGAGCCCTTATGTAGGAGCCCT
CCTCCTAAGTTTCGAGCTGGACTCAGTGTTTAAGTACTTGGTATCGGCTATTGCGCCCCGC	TTACACTCGGACCTCGTCGACATGCATTGCTTGCAAGCGTCTCTCATGAGCTTAGAACGC	CCTCCTAAGTTTCGAGCTGGACTCAGTGTGCCAAACAGGTATCACAGTCTCACAGGAGGCT
CCTCCTAAGTTTCGAGCTGGACTCAGTGTCATATCTAGGTGGTTAGCCGTGGTGCTTGGAG	TTACACTCGGACCTCGTCGACATGCATTGTTGCTTAGTCCATGCTGAGCACCAATGGCTC	CCTCCTAAGTTTCGAGCTGGACTCAGTGTGAGCTGTTAGACCTAGTAGGTGCCCTGCATAC
CCTCCTAAGTTTCGAGCTGGACTCAGTGTCGTAGTTCCATCGCAGCTTTTTCTCCAGAGCG	TTACACTCGGACCTCGTCGACATGCATTGGGTACTGATGTCGGTGGTGGTACTGACTTTG	CCTCCTAAGTTTCGAGCTGGACTCAGTGTGGCGAAAACAGTGATGAAGACGCCACAGACGA
CCTCCTAAGTTTCGAGCTGGACTCAGTGTTCAAATCAGGGCTCTATGGTGGCCACTCAAGG	TTACACTCGGACCTCGTCGACATGCATTAGCAGCACCGTCGTTGCTTGAGTATCCTTGTG	CCTCCTAAGTTTCGAGCTGGACTCAGTGTGTTCCCAAATACCCCTATCCCAAGCGCCTTTG
CCTCCTAAGTTTCGAGCTGGACTCAGTGTCCCAATGACCCACCTGCACCTATCGACACTAA	TTACACTCGGACCTCGTCGACATGCATTGGGAAATACCAGCTCCAGGAAGGACATCCTTG	CCTCCTAAGTTTCGAGCTGGACTCAGTGTCTGAGGCAAGGCTACAGTGCTCAAATAGGCCT
CCTCCTAAGTTTCGAGCTGGACTCAGTGTCCTTTCAGCCCTCTAGAGGGCCTTCCCTATAT	TTACACTCGGACCTCGTCGACATGCATTTACCAGCCCCATCCAAAACACTTTTGCCCATC	CCTCCTAAGTTTCGAGCTGGACTCAGTGTGTTTCACCGAGGATGCTGTAGATCATCCAGCC
CCTCCTAAGTTTCGAGCTGGACTCAGTGTTACCTGCCTTGTGATCCCCTCTTCTCTTTCCG	TTACACTCGGACCTCGTCGACATGCATTCCATGGAGCAGATCTCCTCCTTACTTCATAGG	CCTCCTAAGTTTCGAGCTGGACTCAGTGTTCTGTGCTCCACATTACTACCCTTCGTGGCAG
CCTCCTAAGTTTCGAGCTGGACTCAGTGTCTGCTCTGAGCCTCAGATTAGATTGCTCAGCC	TTACACTCGGACCTCGTCGACATGCATTGCATTCGGTCGGCAATTATTGACTAACGGTCG	CCTCCTAAGTTTCGAGCTGGACTCAGTGTTAGCTCGAGCTCGGAATGGAGTAGTCTCATGG
CCTCCTAAGTTTCGAGCTGGACTCAGTGTCCTGGCTACCCTTGCTGGGAATTCAAAAGGCA	TTACACTCGGACCTCGTCGACATGCATTCTGGTTTGAGTGCCCAGTTAGCGCAACTCATA	CCTCCTAAGTTTCGAGCTGGACTCAGTGTCTCAGCTCTCTGATCTCTGATAGTGCTCAGCG
CCTCCTAAGTTTCGAGCTGGACTCAGTGTAATGTTTGGAGGGCGGAAGAAGAGGCTGTAGG	TTACACTCGGACCTCGTCGACATGCATTCAACGCCAATCCCTTTTCAGCTAAGAGCACTC	CCTCCTAAGTTTCGAGCTGGACTCAGTGTGCAATTGCGGTAATCCTGCTGAGTTGGGATGC
CCTCCTAAGTTTCGAGCTGGACTCAGTGTCGTCAGGCCGTTTCCTGACAATGAGAGATTCG	TTACACTCGGACCTCGTCGACATGCATTCTAAGCTGCCCTGGTATTTTCTGCAAGTGACC	CCTCCTAAGTTTCGAGCTGGACTCAGTGTGTGAACGAACAAACGAGAGAGAGCGAGGGTTG
CCTCCTAAGTTTCGAGCTGGACTCAGTGTGGGATGGGCATTGTCTCATGATTGAAGTCTCC	TTACACTCGGACCTCGTCGACATGCATTCTTCAGGCTTCTTCCCTAGCTTTGCTAGCTTC	CCTCCTAAGTTTCGAGCTGGACTCAGTGTCCATGCCTCGATCTCTGAGAGTTGGTGTATCG
CCTCCTAAGTTTCGAGCTGGACTCAGTGTCCAGAAATGAATCAGGGGAGTATGAGCAGAGC	TTACACTCGGACCTCGTCGACATGCATTCGCTCTTGGAGGTGGCTCAATAGTATAGGTAG	CCTCCTAAGTTTCGAGCTGGACTCAGTGTGTGCCTCCTGAACGCAAGCCTCTTGATGTGTT
CCTCCTAAGTTTCGAGCTGGACTCAGTGTGGGATACTTAACTCCACCATCAGATAGACGCG	TTACACTCGGACCTCGTCGACATGCATTGCGCCAGGAATAGATGCTTCTAGAGTGCTATC	CCTCCTAAGTTTCGAGCTGGACTCAGTGTGAGCTATGATCTGCACAGCTCAAGAGGGAGAC
CCTCCTAAGTTTCGAGCTGGACTCAGTGTCCCCGATGAGCTGTATCATTTCCTTTAGCCCA	TTACACTCGGACCTCGTCGACATGCATTCTTCTCTGTATTGTAGGCCACTATGGTGCTCC	CCTCCTAAGTTTCGAGCTGGACTCAGTGTGCAGACTGAGGAAGAGACTGGGCATGATTTCC
CCTCCTAAGTTTCGAGCTGGACTCAGTGTAGTCCGACTATTCACCATTAGCCACTGACAGG	TTACACTCGGACCTCGTCGACATGCATTCCCATACCTGGAGGACCTATCACCTTTAAAGC	CCTCCTAAGTTTCGAGCTGGACTCAGTGTCCCAGTTGCTTATCTGGGTCAAGCTAAGAGGG
CCTCCTAAGTTTCGAGCTGGACTCAGTGTGGCTTCATAGAAGCAGTTTCCATCATGCTGGG	TTACACTCGGACCTCGTCGACATGCATTAGAGTGATTAGCAACAGCGAAACCGACTCTGC	CCTCCTAAGTTTCGAGCTGGACTCAGTGTGCTTGACCCAGCTTAAGCAACTGGGTCAAAGC
CCTCCTAAGTTTCGAGCTGGACTCAGTGTGACCATAGTTCAGTCCTGACCCTAACTTCCCA	TTACACTCGGACCTCGTCGACATGCATTAGCCTTGCAACTCATTACCCTGTTTGGTCCAC	CCTCCTAAGTTTCGAGCTGGACTCAGTGTCCAGGGCTCAATACTGATCCCTAATGAACGCC
CCTCCTAAGTTTCGAGCTGGACTCAGTGTTTCTCGACTTTCGTTTTGTCGCTCGCAACGAG	TTACACTCGGACCTCGTCGACATGCATTCCGGCATCTTTAGCCATTGAAGCGAAGTTTCC	CCTCCTAAGTTTCGAGCTGGACTCAGTGTGCTGCGCTGAAAATGAGAAACTCAGCGCAGCA
CCTCCTAAGTTTCGAGCTGGACTCAGTGTGGGTTTATTGGTTAGAGAGGGAGAGTTGGGAG	TTACACTCGGACCTCGTCGACATGCATTGCAACCATTTAGCAGTGTGCCACCTTCGATAG	CCTCCTAAGTTTCGAGCTGGACTCAGTGTTGTTGAGGGATGTCTGTGGTTGCATCAGGTCC
CCTCCTAAGTTTCGAGCTGGACTCAGTGTGCCAGCATTGAGGGGAGATATGCTTATGCTCT	TTACACTCGGACCTCGTCGACATGCATTGGATAGCAACTTCTCCAAAGTAAGCTCCTGGC	CCTCCTAAGTTTCGAGCTGGACTCAGTGTCGCAGCACCTTCGAACCGATCTTCTGTGTCTT
CCTCCTAAGTTTCGAGCTGGACTCAGTGTCGCAAAGTGAGTGTCGGGTCTTCTCTAAAGAC	TTACACTCGGACCTCGTCGACATGCATTTGGCAAAAAAGCATATGAGGCACACGCAGGAG	CCTCCTAAGTTTCGAGCTGGACTCAGTGTGGCAGGACTTAGACTCGACCCTTGATGAACAC
CCTCCTAAGTTTCGAGCTGGACTCAGTGTGTAGTGGATTGTAGGCTTATCAGATGCCGGAG	TTACACTCGGACCTCGTCGACATGCATTTCCAGTTACATCTCCAACCCCCACATGAGATG	CCTCCTAAGTTTCGAGCTGGACTCAGTGTATAAACCACTCAAACTGCCTGCTGGCCACCTC
CCTCCTAAGTTTCGAGCTGGACTCAGTGTTCAATTGGGCTGATGTATGGGTTGTGAGCTGG	TTACACTCGGACCTCGTCGACATGCATTCGCCTCTTGGATGATTAAAGTTCCTGCTCCAC	CCTCCTAAGTTTCGAGCTGGACTCAGTGTCAGGTGGAAGGAGACTCTTGAGTAAGGATGCG
CCTCCTAAGTTTCGAGCTGGACTCAGTGTCTATTCCTACTAGTGCGCCCTTTTCGGCTATC	TTACACTCGGACCTCGTCGACATGCATTACGTGTGTGTACATAAAGGGCCTCTCCTAACG	CCTCCTAAGTTTCGAGCTGGACTCAGTGTAGCTGCGGTTGTTGTTATTGCTGCTGCTGCTG
CCTCCTAAGTTTCGAGCTGGACTCAGTGTCATAGCTAACTATTCTCTCATAGGCGCCCTCG	TTACACTCGGACCTCGTCGACATGCATTCGCCATAGCCTACAGGAGTTAGCAAGCTTAGA	CCTCCTAAGTTTCGAGCTGGACTCAGTGTGGCCCGATAGCATGCACCATTACGAATAAGGC
CCTCCTAAGTTTCGAGCTGGACTCAGTGTGGTGACTCTCTGATCAGAGAGGAAAAAAGGGG	TTACACTCGGACCTCGTCGACATGCATTCGTCTCCTACACCAACATGAGAGCATGTCACA	CCTCCTAAGTTTCGAGCTGGACTCAGTGTCCTGACCTCCTCGCCAGGTTATGAGATATCAC
CCTCCTAAGTTTCGAGCTGGACTCAGTGTACTCCGAAGAAAAAGCTGCTGTGGAACTACCC	TTACACTCGGACCTCGTCGACATGCATTGCTAGGTACTGGATTTGCTGAGACTGCTAAGC	CCTCCTAAGTTTCGAGCTGGACTCAGTGTCGCTGATCACAATGATCGCATTCTACCTGAGG
CCTCCTAAGTTTCGAGCTGGACTCAGTGTGAGTTGTTAGACCTAATTGGCGCCCTGAATGC	TTACACTCGGACCTCGTCGACATGCATTCCACAATAGGCTGAGGCGAAAAGAGGCAATTC	CCTCCTAAGTTTCGAGCTGGACTCAGTGTACCCCACTGGCAAGAGAAGTAAATACCTTGGC
CCTCCTAAGTTTCGAGCTGGACTCAGTGTGAACTGTCTGCTGAAGGTTAAAAGGCAGAGGG	TTACACTCGGACCTCGTCGACATGCATTCCGAAGAGGGTGAGCTATATTCATGGGGTTTC	CCTCCTAAGTTTCGAGCTGGACTCAGTGTTGGGGGATGCGCTAACTGCAATTGCGATCAAA
CCTCCTAAGTTTCGAGCTGGACTCAGTGTAGGGCACCGTCCAATCAAATTAGTGTAGCAGC	TTACACTCGGACCTCGTCGACATGCATTCCGCCGCTAATATTTGTGACAAGCTTGCCTCT	CCTCCTAAGTTTCGAGCTGGACTCAGTGTGACTCGCAGAGATTAGCTCAAGCTCATAGAGC
CCTCCTAAGTTTCGAGCTGGACTCAGTGTGACTTTGCACACACTTGTGCGTAATAGCACCC	TTACACTCGGACCTCGTCGACATGCATTGCGAGGAGGCCACAAAATACTATATCAGAGGG	CCTCCTAAGTTTCGAGCTGGACTCAGTGTGAATTAGATTGTCTAGCGGCCAGACGAAGAGG
CCTCCTAAGTTTCGAGCTGGACTCAGTGTGGTAGAGTAGAATGAGGATCAAGAGGCCTAGG	TTACACTCGGACCTCGTCGACATGCATTCTTGCTCCTGTTGCTTATTCCACAGCCCAAAG	CCTCCTAAGTTTCGAGCTGGACTCAGTGTCTACACAATAACGATTGATCAGAGCGCGGGAG
CCTCCTAAGTTTCGAGCTGGACTCAGTGTGAAAGGAAAAGAGGAGAGCGCACTGACTGTGA	TTACACTCGGACCTCGTCGACATGCATTTGGATTAGGTTGGGCCTTAAGTGATGCAGGAG	CCTCCTAAGTTTCGAGCTGGACTCAGTGTTAGGTCGTCAAGGGTACAGCGTTGAGCTAAAC
CCTCCTAAGTTTCGAGCTGGACTCAGTGTAGCTTTCCAAGGGCAAACCTCAATGACGATGG	TTACACTCGGACCTCGTCGACATGCATTCGTCAGGTAGAAGATGAAGAAGACCTACAGCC	CCTCCTAAGTTTCGAGCTGGACTCAGTGTTAGAATTAAGCCCTTGCAGCCAACCTGCTGGA
CCTCCTAAGTTTCGAGCTGGACTCAGTGTGTATGCTAGTGATTTCTCCCCATAGAACGCCC	TTACACTCGGACCTCGTCGACATGCATTGACCCAGATTTGCTCATTCTCTGAAGGCAACG	CCTCCTAAGTTTCGAGCTGGACTCAGTGTACCTCTGCTCTGTATGTCGAAAACAGAGAGCC
CCTCCTAAGTTTCGAGCTGGACTCAGTGTTTAGTTTAGCCGATAGTGCCGAAAAACCCCCC	TTACACTCGGACCTCGTCGACATGCATTGCCATACGCATTTCTTGTTCTGAGGGATTGCC	CCTCCTAAGTTTCGAGCTGGACTCAGTGTCCCGGGGGATGATCGATATATTTATGGGTGCA
CCTCCTAAGTTTCGAGCTGGACTCAGTGTGGGGAAAGAATGCAAAGACCCATCGAACGAAG	TTACACTCGGACCTCGTCGACATGCATTCAGAAAGAGGGAAGACGGCGAATCTGATCAAC	CCTCCTAAGTTTCGAGCTGGACTCAGTGTGGGCGCAATGGGATGATCGATATATATGGGTG
CCTCCTAAGTTTCGAGCTGGACTCAGTGTGTTGATGGTGGTGATGGAAGAGAAGGTAGTGG	TTACACTCGGACCTCGTCGACATGCATTCTTTTTAGTTGGCAAGCAAGTTCGCGCCAGCT	CCTCCTAAGTTTCGAGCTGGACTCAGTGTCGGGTACAGAAGACCCTGAATCATTCCTCTGA
CCTCCTAAGTTTCGAGCTGGACTCAGTGTGGGCAGTGAGAAGTCTCGATCTTTTAATCGGC	TTACACTCGGACCTCGTCGACATGCATTGCCAATGGCCATCCTATGAAACCTCTCAGAGT	CCTCCTAAGTTTCGAGCTGGACTCAGTGTGCAACTGTATGAGCACTAGGCTATTGAGCACC
CCTCCTAAGTTTCGAGCTGGACTCAGTGTTGGGGCAGTTTGCAAGCAGTTCAGTTTTCGCA	TTACACTCGGACCTCGTCGACATGCATTCTTCATCCACGAAGTCCAAGTCCTCGAAATCG	CCTCCTAAGTTTCGAGCTGGACTCAGTGTCTCCTATTAACCACTACCATCCTCCCTTGACC
CCTCCTAAGTTTCGAGCTGGACTCAGTGTAAGCCTACGACGAATAAAGAGGTAAGGGCGCT	TTACACTCGGACCTCGTCGACATGCATTAAGGCTTCAAACTCGGAGCGGTGATTTGTTCC	CCTCCTAAGTTTCGAGCTGGACTCAGTGTCTGCATATTCCTTTGCGCAACCATCTTCGTGC
CCTCCTAAGTTTCGAGCTGGACTCAGTGTCCAGCACGATGATCAACGCCTACTTGCTAAGT	TTACACTCGGACCTCGTCGACATGCATTGCTTGGATAGTGGCATCTCTTGGTATATCGCC	CCTCCTAAGTTTCGAGCTGGACTCAGTGTGCCCCTCTTAGAGCTAATTCAGGCTCCATTTC
CCTCCTAAGTTTCGAGCTGGACTCAGTGTCGATCAGCTCGTTCAAGACAGATTGGTCATCG	TTACACTCGGACCTCGTCGACATGCATTGGGCATTGACTGTGGCGTGATTAGACAAGTTG	CCTCCTAAGTTTCGAGCTGGACTCAGTGTCTAAGATGCAGTAGACTAACAGGGGAGAGCTC
CCTCCTAAGTTTCGAGCTGGACTCAGTGTCGAGAGGCATCCTTTCCTGGCCTTTAAACTGA	TTACACTCGGACCTCGTCGACATGCATTGTTCACCGTAGGGCAGTAAGCAACAACTCCAT	CCTCCTAAGTTTCGAGCTGGACTCAGTGTCTTAGCGCTGAGCCACAATACTTTCAACGGCA
CCTCCTAAGTTTCGAGCTGGACTCAGTGTTCTCACAGATAAAGCTGAGCACGTGGTTGAGG	TTACACTCGGACCTCGTCGACATGCATTCTCCTTCTACCCCTTGATTCTCTGCGAGAACA	CCTCCTAAGTTTCGAGCTGGACTCAGTGTGCTACAATGCCATTTCTGAGGGCAGGCTTTAG
CCTCCTAAGTTTCGAGCTGGACTCAGTGTGGGGAGGAGGTGGTGAGAATTAATGAGGATTG	TTACACTCGGACCTCGTCGACATGCATTCCAAGTAACACCATCACCCAGAGGTTTACCTG	CCTCCTAAGTTTCGAGCTGGACTCAGTGTGCTTCAAAAACTTCGCATTGCGCTCTTCGGGT
CCTCCTAAGTTTCGAGCTGGACTCAGTGTGGTGGTTGGGTTAGGTCTCTGACTATCCAATA	TTACACTCGGACCTCGTCGACATGCATTGCAGAGGCGCTTGATGGAATCGAATTACTTCC	CCTCCTAAGTTTCGAGCTGGACTCAGTGTCTCTCTTTTCTCCCTATCCAGCAGCGATGTTC
CCTCCTAAGTTTCGAGCTGGACTCAGTGTGGAGGAAGGCTTGGCCATTGTATCTATTTCAG	TTACACTCGGACCTCGTCGACATGCATTGCTTCAGCACATTTTCCATCTTCCGCTAGCCT	CCTCCTAAGTTTCGAGCTGGACTCAGTGTTGCTGCTCATAGATCTTCTGCGTCTCATAGCC
CCTCCTAAGTTTCGAGCTGGACTCAGTGTACCAAGGTGGTGGGATAGCTGTAGATACAACA	TTACACTCGGACCTCGTCGACATGCATTGCACTGATCAGTGCGGACCAGGATATTTCCAA	CCTCCTAAGTTTCGAGCTGGACTCAGTGTGTCTTCAATGGGCAGAATTCGCAGTAGAGCTC
CCTCCTAAGTTTCGAGCTGGACTCAGTGTCCGCAACAGATTCTCTCAGAAAATCCCTTAGG	TTACACTCGGACCTCGTCGACATGCATTGAACAATGAAGAGGCAACACCACCTTCAAGCC	CCTCCTAAGTTTCGAGCTGGACTCAGTGTGTGGTCTTGAGAGGAAACAACCTCGCTAATCC
CCTCCTAAGTTTCGAGCTGGACTCAGTGTTTTATGAATTCCTGTAGCTAGTCCGCCTCCAG	TTACACTCGGACCTCGTCGACATGCATTCGGAGCTGAATATGCTAAAAAGCTCGCAGAGG	CCTCCTAAGTTTCGAGCTGGACTCAGTGTGGATAGTAAGACCCATACAAGGTGGCGCAATG
CCTCCTAAGTTTCGAGCTGGACTCAGTGTCTCCTGAATCTTTGTTCGTGTCCGAACGCTAT	TTACACTCGGACCTCGTCGACATGCATTCACCACTGTGGTAAAAGTCGATAGCACAAGCC	CCTCCTAAGTTTCGAGCTGGACTCAGTGTGGTTTTTCCAAAAAGTGCGACTCGGTGAGAGC
CCTCCTAAGTTTCGAGCTGGACTCAGTGTAGGGAAACTGTAAGCGCCGCTTAGATTGAAGA	TTACACTCGGACCTCGTCGACATGCATTTTGCAGATGCAGGAGCATCAGGCTTAGGTTCT	CCTCCTAAGTTTCGAGCTGGACTCAGTGTCCATGTGCAAGAGACTCGAATATACCTGCAGG
CCTCCTAAGTTTCGAGCTGGACTCAGTGTCCTTCAGCGTCCAGTACCAGTATCAAAATGTC	TTACACTCGGACCTCGTCGACATGCATTGTCAGCGTTAGCTACGGTAGCTGCAGACTAAT	CCTCCTAAGTTTCGAGCTGGACTCAGTGTTGTTAAGGGCCCTTAACGGCGAAAATGGCACT
CCTCCTAAGTTTCGAGCTGGACTCAGTGTCCCACTAAAGCAACAGGAAGAAATCAGATCCC	TTACACTCGGACCTCGTCGACATGCATTTAACCCTTGTGGCTGCGATGGATAAATGGAGC	CCTCCTAAGTTTCGAGCTGGACTCAGTGTAAGCACCGAGCTCATGATGTTACCGTTAGTGC
CCTCCTAAGTTTCGAGCTGGACTCAGTGTGATGAAGTATTGATTCCGGCACTGGGAAGTTC	TTACACTCGGACCTCGTCGACATGCATTGAGCAGTTCGACTTGTGTAAGTGGGGATTGCT	CCTCCTAAGTTTCGAGCTGGACTCAGTGTCACCCAAGCAGTGTTGCGGTGCCTCTAATTAA
CCTCCTAAGTTTCGAGCTGGACTCAGTGTCTTCACTTCCCTATGCAAACCCTGTAGGTATC	TTACACTCGGACCTCGTCGACATGCATTCAGAGATTGTGCTTTGGCTCATGTGATCCCTC	CCTCCTAAGTTTCGAGCTGGACTCAGTGTCAGGACGTCCTAAGTGTAGCTCATTGAGAACG
CCTCCTAAGTTTCGAGCTGGACTCAGTGTCAATCTGTAAATCTCCTTTGGTGGGTCCAGTG	TTACACTCGGACCTCGTCGACATGCATTGCCAAAGCGCAATCTCTGACATCGATAGTTGC	CCTCCTAAGTTTCGAGCTGGACTCAGTGTACTACTTGTCTGATCACCAATCCCAGGAGCAC
CCTCCTAAGTTTCGAGCTGGACTCAGTGTGGACCTCCCTCTAAAGATAGCAAATGTGCACT	TTACACTCGGACCTCGTCGACATGCATTGCCCAAGAACACCGAAGTTACCACATTTGGTC	CCTCCTAAGTTTCGAGCTGGACTCAGTGTGTTCTCAGCAGGTACAGCAGGTAGAGGAATTC
CCTCCTAAGTTTCGAGCTGGACTCAGTGTCTCCCATGCAAATGGTGTGTAATTAACGCCTG	TTACACTCGGACCTCGTCGACATGCATTGAGAGCCTTTGCAGATGAGCACGAAGGTTCTA	CCTCCTAAGTTTCGAGCTGGACTCAGTGTTGGCCTACATTAAGGCTCGATTCTATCGCCTC
CCTCCTAAGTTTCGAGCTGGACTCAGTGTAGAACTACTAAGGGCTAGGACCCTATCATCAC	TTACACTCGGACCTCGTCGACATGCATTCAATTCATAGTCTGCCTGACTGGGAGTAAGGG	CCTCCTAAGTTTCGAGCTGGACTCAGTGTGGTAAGTCTAGGGGAGATTTAGAGGCAGATGC
CCTCCTAAGTTTCGAGCTGGACTCAGTGTGGGTTTTTGCCTTGATCCATTGAGGCACATAC	TTACACTCGGACCTCGTCGACATGCATTGAGTCTCCGCATGATACTCTGTGGGAGTAACA	CCTCCTAAGTTTCGAGCTGGACTCAGTGTACTGGTGATCCAGCTTGAGCAACTGGATCACT
CCTCCTAAGTTTCGAGCTGGACTCAGTGTCGGCAGAGCAAAGAGAGTAAGAAGTCAGTTTG	TTACACTCGGACCTCGTCGACATGCATTCTCGAAGCATTTAGTTTTGCCTCCTTCTGGCG	CCTCCTAAGTTTCGAGCTGGACTCAGTGTCAATACATACTCCGCCTCCTTATGAGTCAGGG
CCTCCTAAGTTTCGAGCTGGACTCAGTGTGATTGAGTCATCAGTCCGGGAACCTCAAAAGA	TTACACTCGGACCTCGTCGACATGCATTTCTGGGTGCTGTACATTTCAGTAGGGTTCAGC	CCTCCTAAGTTTCGAGCTGGACTCAGTGTCACAGAACTAAACTGCGAGCTCCAAGTGCTAC
CCTCCTAAGTTTCGAGCTGGACTCAGTGTGTGCGTGATTCTTTTTGGCCTCTTTTCCAGGT	TTACACTCGGACCTCGTCGACATGCATTCTGCATCGGCTCCTACTACTGTACCAAATTGG	CCTCCTAAGTTTCGAGCTGGACTCAGTGTGAAGGTACACTTGCTTAAGAGGCTCCTTCAGG
CCTCCTAAGTTTCGAGCTGGACTCAGTGTTGTATACTGAACCCTGACAGAAGAGAAGGTGG	TTACACTCGGACCTCGTCGACATGCATTTGCTTCGCTTTTTCTGGGATTGTTGGAGCTGC	CCTCCTAAGTTTCGAGCTGGACTCAGTGTGCATTCTCACCAGCATTTGCACCCAATTCTGC
CCTCCTAAGTTTCGAGCTGGACTCAGTGTGAGAACCAAGTGGGTCAAAGTACAGTTTCAGG	TTACACTCGGACCTCGTCGACATGCATTCCTGCCTCGAGCTATGCGAAATCGAGAATATC	CCTCCTAAGTTTCGAGCTGGACTCAGTGTGAGGTGTCAGGTGAAGATAACGGTTATCCAGC
CCTCCTAAGTTTCGAGCTGGACTCAGTGTGGGTTTCGAAACTTCTTCAGGTATACTAGGGC	TTACACTCGGACCTCGTCGACATGCATTCCAGAGGATAAGCAAAAGGCATTTGAGAGCGG	CCTCCTAAGTTTCGAGCTGGACTCAGTGTCACAAGGGAAAAGTTCCTAAAGGCTCCTCCCT
CCTCCTAAGTTTCGAGCTGGACTCAGTGTACGAAACCTAGTGGTAACTGTTTCTACGAGGC	TTACACTCGGACCTCGTCGACATGCATTCCAGTGCAGTTCACAGAGAAAGCTTTCAGTCC	CCTCCTAAGTTTCGAGCTGGACTCAGTGTCCTTTATGTAGGTCTCTTGCTTGCCGACTAGC
CCTCCTAAGTTTCGAGCTGGACTCAGTGTCCTGGTCTTAGGTAAGAACCCTGTACTAAACC	TTACACTCGGACCTCGTCGACATGCATTGCCAGGTTTCATAGATTGCCACACCCACTATC	CCTCCTAAGTTTCGAGCTGGACTCAGTGTTAGGTGCTCTATCAGAAGAAAATCCCCCACCC
CCTCCTAAGTTTCGAGCTGGACTCAGTGTCGATTCTGGCTGGATTACTGCAGAGATATTGG	TTACACTCGGACCTCGTCGACATGCATTTCGGGGAAAAGGGACTTAACCCAGTCAACTTC	CCTCCTAAGTTTCGAGCTGGACTCAGTGTGAGGGAATTTGAGGAACTTCAAGGGCCTCAAC
CCTCCTAAGTTTCGAGCTGGACTCAGTGTGGCCATGCCTTATTGAGAGGTATTAACCTGAC	TTACACTCGGACCTCGTCGACATGCATTGTTGTTGGAGCAGGTCCAATAGTGACTTTGCC	CCTCCTAAGTTTCGAGCTGGACTCAGTGTAGTTTACTCAAATCCTACACCTACCCGTGGGC
CCTCCTAAGTTTCGAGCTGGACTCAGTGTAGGCCCTATCAGAGATTAAATGACCACAGTGG	TTACACTCGGACCTCGTCGACATGCATTGGCTGGAATGGATGGGTTGATGAGTACAAACC	CCTCCTAAGTTTCGAGCTGGACTCAGTGTGGAGGATCAGGTATGGATGTGATAGTAGCTCC
CCTCCTAAGTTTCGAGCTGGACTCAGTGTCGCCTTCGAAGTATTTTACTTGGCGAGCTACA	TTACACTCGGACCTCGTCGACATGCATTTGAGTGCATAACCTTTGAGGCAACGGTTGAGC	CCTCCTAAGTTTCGAGCTGGACTCAGTGTCCGCAGAAATCGAACCTGAATTAGCCATGTCA
CCTCCTAAGTTTCGAGCTGGACTCAGTGTTGAAAAAGAGCCCATTAGAGCACCGATGGATC	TTACACTCGGACCTCGTCGACATGCATTCCAATAGCGTACTCGTCGTTTTTAGAGCGCTC	CCTCCTAAGTTTCGAGCTGGACTCAGTGTCGCACAATGATCCAAAATGGACTGTGCGATCA
CCTCCTAAGTTTCGAGCTGGACTCAGTGTGGCTAGCCCTTTATCAGTCATTCCCAAATCAG	TTACACTCGGACCTCGTCGACATGCATTTTAGCACGAGGACATGGGCCATCAAGAAAGAG	CCTCCTAAGTTTCGAGCTGGACTCAGTGTGGATGTGAAGCATACACTTGACAACAGCTACC
CCTCCTAAGTTTCGAGCTGGACTCAGTGTCTTTTTGGTCCTTGGTAAGTGAAGGGGCTTGA	TTACACTCGGACCTCGTCGACATGCATTAGCAAGCAGAACCTTGATGTTTTCCCTTGGCT	CCTCCTAAGTTTCGAGCTGGACTCAGTGTGATAGCAATTGCAAAGAGTGGTTTCCAGCAGC
CCTCCTAAGTTTCGAGCTGGACTCAGTGTGCTAGAACTCTTCGCTTTGCAAAGCTCATGCT	TTACACTCGGACCTCGTCGACATGCATTGGGTTTTATGGGGCGTTTAAGTACTCTTGGCA	CCTCCTAAGTTTCGAGCTGGACTCAGTGTTGATAATTATAGGCTCACCCCAGGGGGAGAAT
CCTCCTAAGTTTCGAGCTGGACTCAGTGTTTGGAAGATCTTCTGTAGCGATCAGACACCGA	TTACACTCGGACCTCGTCGACATGCATTCCCTCCTAATAATTCAACTTCAGGCAGTGAGG	CCTCCTAAGTTTCGAGCTGGACTCAGTGTCCCATCTTAAGCCTTTATCTGCTCACATGCAC
CCTCCTAAGTTTCGAGCTGGACTCAGTGTGTGGTTTGTTGAGGGTTCCTTGTTAAGGGATG	TTACACTCGGACCTCGTCGACATGCATTTCTGAGCTACTGACACCACTAACTGGTTAAGC	CCTCCTAAGTTTCGAGCTGGACTCAGTGTGTGGTCAAATGTTCCCTTTATAACCACCCCCA
CCTCCTAAGTTTCGAGCTGGACTCAGTGTAGAGAGCCGCCTAAGCGATGGTAATAATTCCT	TTACACTCGGACCTCGTCGACATGCATTCTAAGACGCTATCTGTGTTTGTTCCACCTACG	CCTCCTAAGTTTCGAGCTGGACTCAGTGTGGCATCAAGAGTTGGAAGCTCCAGATAGTTTG
CCTCCTAAGTTTCGAGCTGGACTCAGTGTGCACAAAAAGTGAGGCGCCCTTTAAGAGAAGT	TTACACTCGGACCTCGTCGACATGCATTGCTGTTATGAGCAAAGGTATCCCAAGAACAGC	CCTCCTAAGTTTCGAGCTGGACTCAGTGTGCTCTGGACTCATTATCTTCAAAGTGGTTCCC
CCTCCTAAGTTTCGAGCTGGACTCAGTGTGAAGCTTTGCCTCACTCAATCTCCTCATCTAC	TTACACTCGGACCTCGTCGACATGCATTGGAAACAGCGGATTGAAGCAGTCTAAAGGCAA	CCTCCTAAGTTTCGAGCTGGACTCAGTGTTTGAGGAACTCCTCCAACAAGCTCTTAATCCG
CCTCCTAAGTTTCGAGCTGGACTCAGTGTAGTCTAGGCAAATCAGGACATAGAGCTTTGGG	TTACACTCGGACCTCGTCGACATGCATTGTTGGTGGTGGTGCTTGCTTAGTTGACAGTAA	CCTCCTAAGTTTCGAGCTGGACTCAGTGTCTGGTAAGCGATGGGAGAAGAGGAAGAATAAC
CCTCCTAAGTTTCGAGCTGGACTCAGTGTTAAACCAGATGGCAGGAAGGTTTAGGTAGGAG	TTACACTCGGACCTCGTCGACATGCATTCTTCACAAACACCCTAAGTGGCTTCTTCAAGG	CCTCCTAAGTTTCGAGCTGGACTCAGTGTGCAGGAACAGCTGTATTTTTCATTCTGCCCTC
CCTCCTAAGTTTCGAGCTGGACTCAGTGTGCCATTTAAGGCAAGCAATGGCTGGTTTATCC	TTACACTCGGACCTCGTCGACATGCATTGGATCAGGAGGTGGTGGTTCAGTAGAAAAATC	CCTCCTAAGTTTCGAGCTGGACTCAGTGTCTGAGGTGCTGGCTCTCTAGAGAAAAAGTGTA
CCTCCTAAGTTTCGAGCTGGACTCAGTGTCGCTTATCAGAGGAATCAAAGAAGATGGGGAC	TTACACTCGGACCTCGTCGACATGCATTGCAAGCCAAAGCATTACATCCTCCAACCTCAA	CCTCCTAAGTTTCGAGCTGGACTCAGTGTGCTGCTTGAGAGCAGCAAGCTAGCTCTTATAA
CCTCCTAAGTTTCGAGCTGGACTCAGTGTCTCTGCTTCTTGACTTGTTGACTTGGAATGCG	TTACACTCGGACCTCGTCGACATGCATTTGTGATGTGTAGAGCTTTCCCTGAATTGTGCG	CCTCCTAAGTTTCGAGCTGGACTCAGTGTCATTCAACTTTTCTTACAAGGGCGCAAGCCAG
CCTCCTAAGTTTCGAGCTGGACTCAGTGTCGATAAGAATATGCTCTGAAGCCATAACGCCC	TTACACTCGGACCTCGTCGACATGCATTAGTTGCTTGTCGCTGTGTTTCCCTAATTTGGC	CCTCCTAAGTTTCGAGCTGGACTCAGTGTTGGGTAGGAGTAGGAATACTTGAGGGCTTTTC
CCTCCTAAGTTTCGAGCTGGACTCAGTGTGGCGCCCTACATGCATTTCTTATTGAAGCCAA	TTACACTCGGACCTCGTCGACATGCATTCACTGCGATGAGCACCTTACAAGGTTTTCTTC	CCTCCTAAGTTTCGAGCTGGACTCAGTGTGTTTAATTTTCCCCAGCGTTGGCCTAGTCTCA
CCTCCTAAGTTTCGAGCTGGACTCAGTGTGGGTCAGATATCCCTCAAAAATTGGAGACGAC	TTACACTCGGACCTCGTCGACATGCATTCCCGCTCAATTAGGTAACTCCATCATCTTAGG	CCTCCTAAGTTTCGAGCTGGACTCAGTGTGTAGCTGATAATGCGCATACAAATGGTGCAGC
CCTCCTAAGTTTCGAGCTGGACTCAGTGTCCTTACTTGCTTTTGCAACCAAGCTTAGCTCC	TTACACTCGGACCTCGTCGACATGCATTGGGTCCAAGAACGTAGTTATCACCAGAGATAG	CCTCCTAAGTTTCGAGCTGGACTCAGTGTCCACATGATGTTAATACCCGAGTGAAGGAAGG
CCTCCTAAGTTTCGAGCTGGACTCAGTGTGAGTGGTAAGCGGTTTTAACTTGAGCGTTCAC	TTACACTCGGACCTCGTCGACATGCATTGCTTTCCAACATCGGCGGTTTAACTGTTTTCG	CCTCCTAAGTTTCGAGCTGGACTCAGTGTAGCCTTCTCCCAAAGAAGACTTAGCTTAGAGC
CCTCCTAAGTTTCGAGCTGGACTCAGTGTGCTCAAGCTGGACTTCAATAGCTTTGTGATCC	TTACACTCGGACCTCGTCGACATGCATTGTGCGTTAGCGAATTAGACGTTCTTAGCAGTC	CCTCCTAAGTTTCGAGCTGGACTCAGTGTCGATTCCACCATACCTCCCTTTTAGTCCAGTA
CCTCCTAAGTTTCGAGCTGGACTCAGTGTAGAGGCACTACCTCTTTAATGAGGAGCTAACC	TTACACTCGGACCTCGTCGACATGCATTCTTCCACTTACGTTGACACTGGTAAGTCCTTC	CCTCCTAAGTTTCGAGCTGGACTCAGTGTGTTCCACCGCAGCTTTTTGTTCAGAGCATAAG
CCTCCTAAGTTTCGAGCTGGACTCAGTGTCGTTTCACCACCCCTAACTCACCAACTTAATC	TTACACTCGGACCTCGTCGACATGCATTCCATTGTTTAGGCAGCACAAACTGCAACCAAC	CCTCCTAAGTTTCGAGCTGGACTCAGTGTGGGGATTTGGCAGCTCTTATGCTGTTTCTCTT
CCTCCTAAGTTTCGAGCTGGACTCAGTGTTGCAGCTTGCTCATCATCATATTCTCGTTCGC	TTACACTCGGACCTCGTCGACATGCATTGCGACTGTTCCTCAAGTTCAAGCAATCAAAGC	CCTCCTAAGTTTCGAGCTGGACTCAGTGTGTCAGCAAAGGGTTTATTTGTCAGCAGGTGGT
CCTCCTAAGTTTCGAGCTGGACTCAGTGTTGGCAGGGGATGAATGTTTAGCTTGCTTAGGA	TTACACTCGGACCTCGTCGACATGCATTGGGAGAGTGGATATTTGAAGGCCAAAACAAGC	CCTCCTAAGTTTCGAGCTGGACTCAGTGTCTAGGTTTTACCTTCAAACTTTACCGTCCCGC
CCTCCTAAGTTTCGAGCTGGACTCAGTGTTGAGCAGCAATAACTCTGGGGATATCCTCTTC	TTACACTCGGACCTCGTCGACATGCATTTTGCCAAATGACATAATCGCAGAGGCTGGTAG	CCTCCTAAGTTTCGAGCTGGACTCAGTGTGCGATTAATTTCCAAAAGGGCGCCTCTGAAAC
CCTCCTAAGTTTCGAGCTGGACTCAGTGTAGATACCGTATTACCTTTTCCCTAGGCTCTCG	TTACACTCGGACCTCGTCGACATGCATTGACCTCCTGAGGCTTCACTACTATAGCTCTAT	CCTCCTAAGTTTCGAGCTGGACTCAGTGTGTCAGACAAAAGAAAGACATGAGGACCTGCTG
CCTCCTAAGTTTCGAGCTGGACTCAGTGTGAATGCTCTAAGGAACAGTAAGAGCTCCTAGG	TTACACTCGGACCTCGTCGACATGCATTCTGTATTGGTCTTTCTGCGTTAGCACTCAAGG	CCTCCTAAGTTTCGAGCTGGACTCAGTGTCTGAGCTTCTTTTGCTCAAACTTCACACCCTC
CCTCCTAAGTTTCGAGCTGGACTCAGTGTCTTGCCCTAGAGTCGATCGAATAGCATCTGTA	TTACACTCGGACCTCGTCGACATGCATTTCACTATCTCTACCCGGCCTTTCGCTAAAATG	CCTCCTAAGTTTCGAGCTGGACTCAGTGTATCATTGTTACTCCGTCAGGTGAAGCTCCAAG
CCTCCTAAGTTTCGAGCTGGACTCAGTGTCTGCTCTATGAGGTGGAGCATTATCGTACTGA	TTACACTCGGACCTCGTCGACATGCATTCTCCATACTGAATAGAGCTAGAGGATGACTGC	CCTCCTAAGTTTCGAGCTGGACTCAGTGTATGCTGGGATGAGGGTGTTAAACACTGTAAGG
CCTCCTAAGTTTCGAGCTGGACTCAGTGTGCTTGACTCATCTTAAGCTACTGGGTCAAAGC	TTACACTCGGACCTCGTCGACATGCATTGAGCTCATAGCCCATATATCTCCATATGCTCC	CCTCCTAAGTTTCGAGCTGGACTCAGTGTGTTCTTTATGGTTTAAGCACCTCCTGGCGCTA
CCTCCTAAGTTTCGAGCTGGACTCAGTGTCGGCTAAATCATATATTTATCGGCACCAGCCG	TTACACTCGGACCTCGTCGACATGCATTGCTGGGGATGTTCCTATAGTTCTAGAAGCACT	CCTCCTAAGTTTCGAGCTGGACTCAGTGTCTGGTAGGTTGAGGAGTGACTATTTTGAGGAG
CCTCCTAAGTTTCGAGCTGGACTCAGTGTGGGGTTGTAGGCAGACTTAAACGAGTAATACC	TTACACTCGGACCTCGTCGACATGCATTTCACTATCTCTACCCGGCCTTTCGCTAAAATG	CCTCCTAAGTTTCGAGCTGGACTCAGTGTAGGATCATTCTCCATCTTATCCAGTACGCCAG
CCTCCTAAGTTTCGAGCTGGACTCAGTGTGCGATGAAGAGACTCAAGACACTTCAAGTAGC	TTACACTCGGACCTCGTCGACATGCATTCTGGGTCGATGCGAACAATTTATAGAATGCCG	CCTCCTAAGTTTCGAGCTGGACTCAGTGTCCTAGATTGCTAAGCCTGGTATTGAGAAGGCA
CCTCCTAAGTTTCGAGCTGGACTCAGTGTGTGCCCTAAAATTTTTTGGCCAGGAAATGCCC	TTACACTCGGACCTCGTCGACATGCATTGATCCTCCAAAGAAATCTCCGACTGAAGCTTC	CCTCCTAAGTTTCGAGCTGGACTCAGTGTCCGAATAAAGGATTTTTGCTCTGCTAGGGTGG
CCTCCTAAGTTTCGAGCTGGACTCAGTGTGTGGCGAAGCTGATTCAGTCAGTTCATTTAGC	TTACACTCGGACCTCGTCGACATGCATTGGAAACTTAGCTTCTATGGCAAAGGAAGCTGC	CCTCCTAAGTTTCGAGCTGGACTCAGTGTCTGGTAATGTACCTGTTTCAATCAGGCGCTGA
CCTCCTAAGTTTCGAGCTGGACTCAGTGTAGGCACCTACCAAATTTTCCTCTCAGAGCGTT	TTACACTCGGACCTCGTCGACATGCATTGGGGAAAGGTACTGTGGCTAATACATCGAAGA	CCTCCTAAGTTTCGAGCTGGACTCAGTGTGCTCTACATTGAGAGCACTTCAAGCTACTCTG
CCTCCTAAGTTTCGAGCTGGACTCAGTGTGTCTTCCGTTCAGACCAACTGAGGTTCTATGT	TTACACTCGGACCTCGTCGACATGCATTGAGGGTTGAGTCTATCCTTAGCTGCTTTAAGC	CCTCCTAAGTTTCGAGCTGGACTCAGTGTGAGCAGGGAGATGTGATCTATCTTCTATCCTC
CCTCCTAAGTTTCGAGCTGGACTCAGTGTGTAAGGTACTAGACAGTAATACAGTAGGCCCC	TTACACTCGGACCTCGTCGACATGCATTCTACTCTGCCTTGAAGGAGAATGTAAAGGTCC	CCTCCTAAGTTTCGAGCTGGACTCAGTGTGTTTTTCACTGCCGCTGCAAGTTTTAGCTGAG
CCTCCTAAGTTTCGAGCTGGACTCAGTGTGCTGAGGGATATAGGGAGAGAGAAAAAGATGC	TTACACTCGGACCTCGTCGACATGCATTTTCGGGAACATCGCTACAATCGCTAAAGATGC	CCTCCTAAGTTTCGAGCTGGACTCAGTGTGGTTTGATAGCAATGGGTGCTCAATCCATTGC
CCTCCTAAGTTTCGAGCTGGACTCAGTGTCCCTCTATTCATCTAGGAGTCATGTCCCTTCT	TTACACTCGGACCTCGTCGACATGCATTATCTGGCTAAGGAGCTGGTATCTTTGCAAACC	CCTCCTAAGTTTCGAGCTGGACTCAGTGTCTGGGATGCAAAATCTTTCTCGTCCTATCTCG
CCTCCTAAGTTTCGAGCTGGACTCAGTGTGCAAAACCTAAGCTTGACGCACCCATTTGACT	TTACACTCGGACCTCGTCGACATGCATTGATCCTGCTATGTAAGAGCCATGACAGATTGC	CCTCCTAAGTTTCGAGCTGGACTCAGTGTAGGCCTATCTAACAGTGTGCCATTTGCTTTGG
CCTCCTAAGTTTCGAGCTGGACTCAGTGTGACTATGGGAAGGATTACAGCTCTCAGCAGAA	TTACACTCGGACCTCGTCGACATGCATTCCTACGGGTACTACGAAAGAGCAATCCAAATC	CCTCCTAAGTTTCGAGCTGGACTCAGTGTGAGTTTCTGGAATCATCGCAAAGTGTGTCTCC
CCTCCTAAGTTTCGAGCTGGACTCAGTGTCAGCAGCCTTATCACTCTCGTCTAGGATATTG	TTACACTCGGACCTCGTCGACATGCATTTATCGTTTGGCATTCGTGCACAGCAACAAACG	CCTCCTAAGTTTCGAGCTGGACTCAGTGTGATTTGGGTTTCCTACACTCAAAGCAAGCTCC
CCTCCTAAGTTTCGAGCTGGACTCAGTGTGGAAGATCCAACTAACTCAAGAGCAAAGGGAG	TTACACTCGGACCTCGTCGACATGCATTTCTTGCTCAGAGTGTCAAAGAAACCTTCACCC	CCTCCTAAGTTTCGAGCTGGACTCAGTGTTAGGGATCGACCGTGTATATACGGTAAAACCG
CCTCCTAAGTTTCGAGCTGGACTCAGTGTCAAAAGCTAAACCCAGGCTTGGCTTTTACGCA	TTACACTCGGACCTCGTCGACATGCATTGGAGCCTAATAACGATGCATTAAGTGGTGGAG	CCTCCTAAGTTTCGAGCTGGACTCAGTGTGAGGCTATTTTCTGAATTGCGCTCAACCCTTG
CCTCCTAAGTTTCGAGCTGGACTCAGTGTAATGATGATGCTGTCTCACGAACAGTGATCCT	TTACACTCGGACCTCGTCGACATGCATTTGACTGTTTGAGTTTACTCTGTTGCTGCTCCG	CCTCCTAAGTTTCGAGCTGGACTCAGTGTCTGCCCTATGAGAGATTACAATGGACCTCGTA
CCTCCTAAGTTTCGAGCTGGACTCAGTGTCAGAGCTTTCAGAGTTAATATGCACGCCTTTC	TTACACTCGGACCTCGTCGACATGCATTTGGGGCAGAGGATTTGAGGGATAATTAGGAAC	CCTCCTAAGTTTCGAGCTGGACTCAGTGTGATCAGTTGGTAGAAAAAGCCTCTCCTCTACC
CCTCCTAAGTTTCGAGCTGGACTCAGTGTGGGGCAGGAAAAGATATTTTGGTGCTTGAAAC	TTACACTCGGACCTCGTCGACATGCATTGGAATATCAAGCTGCAAAATACCGCCATGTCC	CCTCCTAAGTTTCGAGCTGGACTCAGTGTGGATCAGCAACCAGTAAACAGACAGGAACAAG
CCTCCTAAGTTTCGAGCTGGACTCAGTGTGCCAGAAATCCCTTTACCAGATGAATTCAGAC	TTACACTCGGACCTCGTCGACATGCATTTGAGGGATTAGTTAGCACTTTACATGCTCCGG	CCTCCTAAGTTTCGAGCTGGACTCAGTGTGAGTTGGAGCTATGTTGGTCAGCTTAGAAAGG
CCTCCTAAGTTTCGAGCTGGACTCAGTGTTGCACACTCAGAATAGAGTGTAGCCTCTAATC	TTACACTCGGACCTCGTCGACATGCATTGGCCAGCCGTTCAAGATTCAGTAATAACGCAA	CCTCCTAAGTTTCGAGCTGGACTCAGTGTCCTATGGTAACATTGTATCTGACCCTGGTGCA
CCTCCTAAGTTTCGAGCTGGACTCAGTGTCCTTTCATGTTATGGGATGATTCCTTAGGAGG	TTACACTCGGACCTCGTCGACATGCATTGTGAAGTCTAGTCAGGTTAATCTTCGCTTGGC	CCTCCTAAGTTTCGAGCTGGACTCAGTGTGGTCTGAAAGCTTCTGCATATGGTATGCTAGG
CCTCCTAAGTTTCGAGCTGGACTCAGTGTCTGGAACGTGGCTTCCTGTAAACCAGAAATAT	TTACACTCGGACCTCGTCGACATGCATTAAAGAGGGATTAGGAAAGGAAGTCGTTGCTGG	CCTCCTAAGTTTCGAGCTGGACTCAGTGTCAGGCTCCGCTGGTATAAACTATATGCTGATG
CCTCCTAAGTTTCGAGCTGGACTCAGTGTGTGGAGCAAACTATCCAGTCTAGCTTTTTTGG	TTACACTCGGACCTCGTCGACATGCATTGCAGCTGCCTAAAAGTAAACTCGCTGTATTCC	CCTCCTAAGTTTCGAGCTGGACTCAGTGTGTACGATGACTGGTAGCTAGTATTAGGTTGCC
CCTCCTAAGTTTCGAGCTGGACTCAGTGTGAAGAAGTTTGCAAAAAACGTGACTGACGACC	TTACACTCGGACCTCGTCGACATGCATTGGCCTATTCAACCAACTCAGGATAGCATTGAG	CCTCCTAAGTTTCGAGCTGGACTCAGTGTCTGACCCTCAACTCGTTTAGCAAAACTGCATC
CCTCCTAAGTTTCGAGCTGGACTCAGTGTCCCTAAGGTAATTTCTTTAAGCTCAGAGGGCT	TTACACTCGGACCTCGTCGACATGCATTGATGGTAAATTAAAGGGAGCAGTCCTTGACGG	CCTCCTAAGTTTCGAGCTGGACTCAGTGTGAAGGGCGTTTGGTAGGTTTGCTCTTTATGTC
CCTCCTAAGTTTCGAGCTGGACTCAGTGTCGCCTAGCAAGTTTGGTATGTTAAAATCTCCG	TTACACTCGGACCTCGTCGACATGCATTTGCCTTGATAATTTCGTCAACGCTCCAGAGCT	CCTCCTAAGTTTCGAGCTGGACTCAGTGTCCCGCAAGTTACCTGTTAGAACACCAAAACCT
CCTCCTAAGTTTCGAGCTGGACTCAGTGTTTGGGAGAAGCAGACATAGATAAAGCCTTCCA	TTACACTCGGACCTCGTCGACATGCATTAGGATGAGATGTTATACACTAGAGCCGCCAAG	CCTCCTAAGTTTCGAGCTGGACTCAGTGTGAGGGAAGAGAATCCTGCATGTGAAATAGGCT
CCTCCTAAGTTTCGAGCTGGACTCAGTGTAGGGTAATGTTCCATCTTAGCACGGTATCATC	TTACACTCGGACCTCGTCGACATGCATTGGAACATTACGAAGAGTATATCCACCACCTCC	CCTCCTAAGTTTCGAGCTGGACTCAGTGTCCAGGATGACCCTTAACAATACTCCCTCATAC
CCTCCTAAGTTTCGAGCTGGACTCAGTGTGACGCATCTTATTGGTCTGAGCTCTTTGATGA	TTACACTCGGACCTCGTCGACATGCATTGGTGGTTTGCATCATGCTAAGCAATCAGAAGC	CCTCCTAAGTTTCGAGCTGGACTCAGTGTTGAGATTGCTATGGCAATACCTCCATGAGCTC
CCTCCTAAGTTTCGAGCTGGACTCAGTGTATTGGATGGTAGAGAATTAACAATCGGGGCGT	TTACACTCGGACCTCGTCGACATGCATTTGGATTCAAAGGCTTGCATGAAGTTCCTGCAG	CCTCCTAAGTTTCGAGCTGGACTCAGTGTGGCGCAGAGGAAATAATCACTCCAAAACAGAC
CCTCCTAAGTTTCGAGCTGGACTCAGTGTTGTAAACCATCAGAGAATTAACAATCGGGGCG	TTACACTCGGACCTCGTCGACATGCATTAGAACTTCAGGAGCCATAGTCAAGGATGTACC	CCTCCTAAGTTTCGAGCTGGACTCAGTGTCTCTCATTAGGCGATGTGTGTTAGCAAAGTGC
CCTCCTAAGTTTCGAGCTGGACTCAGTGTGAGCACTTGGTTGGTCAAAGTACATTTTCAGG	TTACACTCGGACCTCGTCGACATGCATTCTTGGCATCACAACTCTATCCAAGCTGTTCCT	CCTCCTAAGTTTCGAGCTGGACTCAGTGTGGCCAACCTTAACCTAAAGGCAGTACCACATA
CCTCCTAAGTTTCGAGCTGGACTCAGTGTCTACCAACTTCAACGCCATATGAGCTCATTGA	TTACACTCGGACCTCGTCGACATGCATTTACTAGTCAGCAGGGGAGAATTTGGATCTCTC	CCTCCTAAGTTTCGAGCTGGACTCAGTGTAACCTACAGCTATTCCTCCTCCGTTTTCTCTG
CCTCCTAAGTTTCGAGCTGGACTCAGTGTCTAGGATAAGAGAGATTGGAGGTGAGTGCATT	TTACACTCGGACCTCGTCGACATGCATTTAAATAAACCCACGCTCTGCTGTGAAGGGACT	CCTCCTAAGTTTCGAGCTGGACTCAGTGTTCTCAGAAATAGCCAAGGACCAGCTTGCTTGA
CCTCCTAAGTTTCGAGCTGGACTCAGTGTGGACCAAATAGTCTTCACAGGCATAGACTACA	TTACACTCGGACCTCGTCGACATGCATTGCCTTATAAACTTTCCCAAAAGAACCTCCGCC	CCTCCTAAGTTTCGAGCTGGACTCAGTGTGGATAGCCTCAAAATGACCGGAATCAAGCTTC
CCTCCTAAGTTTCGAGCTGGACTCAGTGTGCTTTCAGGAATAGCGAAATTACAGTCTCTGC	TTACACTCGGACCTCGTCGACATGCATTAAGCCTCTAGCCAAAAGAGTGTGAACATGTCC	CCTCCTAAGTTTCGAGCTGGACTCAGTGTGGTGGACCAAGAAATTTCTGAACTCCTTACCC
CCTCCTAAGTTTCGAGCTGGACTCAGTGTTTTGTTAGCTGTTCGCAACCCCGATGAATTAC	TTACACTCGGACCTCGTCGACATGCATTGGTGTGTTGTGTCCAGAAAAAGGGGAATTGCT	CCTCCTAAGTTTCGAGCTGGACTCAGTGTAGAAAGTCTGAGCTCGAGCCATTTAATCACGC
CCTCCTAAGTTTCGAGCTGGACTCAGTGTGGACCATCCACAAACTAGCATAGCAATATCTG	TTACACTCGGACCTCGTCGACATGCATTTGGAGCGAAGTGAGAAGGGATGTATTAGCTGT	CCTCCTAAGTTTCGAGCTGGACTCAGTGTCTGAAAGAACTGCAAATCGCATCAGCAAGCTC
CCTCCTAAGTTTCGAGCTGGACTCAGTGTATGACTGATGTGTGGTTTTAGAAAGGGAAGCG	TTACACTCGGACCTCGTCGACATGCATTAAAATGAGGAAATGGGGGAAAAGCCTCAAGCC	CCTCCTAAGTTTCGAGCTGGACTCAGTGTGGTCATGCCTGTAGTATTCTTGGTTGAGGTAG
CCTCCTAAGTTTCGAGCTGGACTCAGTGTGCTTTAAGAGTCACGTTGAAGTAAAGAGCAGG	TTACACTCGGACCTCGTCGACATGCATTGAGATGGGGAAGCTTTAATGTAACATAGGGGG	CCTCCTAAGTTTCGAGCTGGACTCAGTGTCAAGATGGCTCCTTAGATATTACACCGTCCAC
CCTCCTAAGTTTCGAGCTGGACTCAGTGTCTAGGTTACCGGCAGATATTCTGGATGATTCA	TTACACTCGGACCTCGTCGACATGCATTGCATTACTCTCTCATAGACCCTTTTTTGCCGG	CCTCCTAAGTTTCGAGCTGGACTCAGTGTGACTCCTCTCCATATTTTGTACCCATTGACGC
CCTCCTAAGTTTCGAGCTGGACTCAGTGTCACCTTTCCGCTTTCAGCTTAGTAGAAAGATG	TTACACTCGGACCTCGTCGACATGCATTTGATGCTTTTGACTGAGCTACTAGGTACTGGC	CCTCCTAAGTTTCGAGCTGGACTCAGTGTTCAACAGCTACGAGAACCTCATGGACCAAATC
CCTCCTAAGTTTCGAGCTGGACTCAGTGTTACCTGAAGCTAATATTCGCCGATGGAAAGCT	TTACACTCGGACCTCGTCGACATGCATTCCTGAAAGAGTAAGTGCAGTAGCAAAAGTGGG	CCTCCTAAGTTTCGAGCTGGACTCAGTGTCCTTATGGTGCAAAAGTGATGATACCGGACTG
CCTCCTAAGTTTCGAGCTGGACTCAGTGTAGACGAATCCCCGGAAAATGGCGAATTTTAGA	TTACACTCGGACCTCGTCGACATGCATTTGGTTCCTCCTATGTTACCAATAGCGCCAACA	CCTCCTAAGTTTCGAGCTGGACTCAGTGTCTGTTATAAGTAAGCCACTTCTCCCCTGTAGC
CCTCCTAAGTTTCGAGCTGGACTCAGTGTCACCTGGAAATTACTGCCATTCAATCAGAGTC	TTACACTCGGACCTCGTCGACATGCATTTTATTGAGTAGCCAAAGCTGCTGCTGGACTTG	CCTCCTAAGTTTCGAGCTGGACTCAGTGTAGGCAACATTCAGCCCTAATCTATTCAAGGCC
CCTCCTAAGTTTCGAGCTGGACTCAGTGTGGACAACACATGTTGTCTCACTTCTAAAGCGA	TTACACTCGGACCTCGTCGACATGCATTGATGAAGGAACGCTCATTTGAGTTTTGGGCAG	CCTCCTAAGTTTCGAGCTGGACTCAGTGTGCCCTCCAGGGAAAATTAGGCAATAGGTAGAA
CCTCCTAAGTTTCGAGCTGGACTCAGTGTTGCTCTGAGCTCTTACCTAATATGGGATGTCA	TTACACTCGGACCTCGTCGACATGCATTCTGTGACCATCCTCTTCTTCTTTCATGTCCTG	CCTCCTAAGTTTCGAGCTGGACTCAGTGTCTGCACACCACCATTGTTTGTTCATGCTGCAA
CCTCCTAAGTTTCGAGCTGGACTCAGTGTGAGCTCTTAGAGAGTTAGAGCTATGTTTGGAG	TTACACTCGGACCTCGTCGACATGCATTGCATCCTCAGTCATCCTTGCGTTAGTGTTAAG	CCTCCTAAGTTTCGAGCTGGACTCAGTGTGCTCATTATTCCCCAGTCAAAGTAGCTGCTAC
CCTCCTAAGTTTCGAGCTGGACTCAGTGTCACTTGGAACTGTTTTAGACCCTTTTCTCCTC	TTACACTCGGACCTCGTCGACATGCATTGCTAAGAAATTTGTGGGATACCTGTGCCAGGA	CCTCCTAAGTTTCGAGCTGGACTCAGTGTGCGGAGTTATTAATAACCGTTTGAGGTTTGGG
CCTCCTAAGTTTCGAGCTGGACTCAGTGTTCCAGCCATTTGTAGGTTGAGCTCAATATCAC	TTACACTCGGACCTCGTCGACATGCATTCCAGGATGAGAAAATTTGGCAGATTCAGGCTC	CCTCCTAAGTTTCGAGCTGGACTCAGTGTCAAGAGTATCAATTAAGAGGTATGTGTGCGGG
CCTCCTAAGTTTCGAGCTGGACTCAGTGTTAAGAGCTGGCCAAAATTACCTAAGCCTGAAG	TTACACTCGGACCTCGTCGACATGCATTGGAAGAGAATAGAGCCTCAAGCTAGCAAATCC	CCTCCTAAGTTTCGAGCTGGACTCAGTGTCAGACATGACTTTTGCAAACAAAGCATCCCCA
CCTCCTAAGTTTCGAGCTGGACTCAGTGTGACGGATATAGGAAATTGCTTCACCCATAGTC	TTACACTCGGACCTCGTCGACATGCATTGGAGCTACCCTCTTCTGAAAATCCTCTCTCTA	CCTCCTAAGTTTCGAGCTGGACTCAGTGTGCCTGCTTAGCCATCTAAAAAGGTGAAAAGTC
CCTCCTAAGTTTCGAGCTGGACTCAGTGTCTAATCTCCGATTAGATAACGCCCTTTGTCGA	TTACACTCGGACCTCGTCGACATGCATTAGTAACAGGGTAGACAAAGGTCTCCTGATTCC	CCTCCTAAGTTTCGAGCTGGACTCAGTGTGATGCCTATTAGGTCTCTTGTGTAGCATTCAG
CCTCCTAAGTTTCGAGCTGGACTCAGTGTCTAGAACTTCCTTCGTGTAGTTAAACCTCTGG	TTACACTCGGACCTCGTCGACATGCATTCCAGTCATCATCGCCAAATGTTGGTGTTGCTA	CCTCCTAAGTTTCGAGCTGGACTCAGTGTGGGGGTGGTAACAATAGTGGTGTTTAAGAGAA
CCTCCTAAGTTTCGAGCTGGACTCAGTGTCGGTGAAATGCTTGAGATGAGATAGACATTCC	TTACACTCGGACCTCGTCGACATGCATTCAAACTCAAGTGGTAAGAAGCTGGCTTCGAAG	CCTCCTAAGTTTCGAGCTGGACTCAGTGTCTAGCTTAGCAGGATAGGGTTAGACATAGAAG
CCTCCTAAGTTTCGAGCTGGACTCAGTGTCATAACCCTCCAAGGAAAATAATTGGAAGGCG	TTACACTCGGACCTCGTCGACATGCATTCGCCCTTGACAACTTCACGAGACATATCGATT	CCTCCTAAGTTTCGAGCTGGACTCAGTGTGGAAAAATGGAGTTGGGTCAGGTTTCTGACTA
CCTCCTAAGTTTCGAGCTGGACTCAGTGTAGGATATAAGGAGCTAGAGGATCACCTTCCAT	TTACACTCGGACCTCGTCGACATGCATTTGCCTTTGTGATGCTATGGGATGGGAAAACTG	CCTCCTAAGTTTCGAGCTGGACTCAGTGTGTGAAGTAAGCGATCAGTGCTAAGTCTGATAC
CCTCCTAAGTTTCGAGCTGGACTCAGTGTGGCACAAAGTGCTCCAAGAAACACCAGATTAT	TTACACTCGGACCTCGTCGACATGCATTCCAGAACGCAACATGTAAATGGCAGTCAAACC	CCTCCTAAGTTTCGAGCTGGACTCAGTGTCTGAGACAGCGATGAACAAGACTTTTAGGACT
CCTCCTAAGTTTCGAGCTGGACTCAGTGTACATCCATTCAGGTCTTTTAGCACTCTGAGCT	TTACACTCGGACCTCGTCGACATGCATTGTTTTCCCCCCTTCCCTCAAAAATCTGACTTC	CCTCCTAAGTTTCGAGCTGGACTCAGTGTGGTTACTCTGCGCAACAAAAGCTATGCTAAAC
CCTCCTAAGTTTCGAGCTGGACTCAGTGTTGCTTAATCAGAGCTATCTGAGCCATATCCTG	TTACACTCGGACCTCGTCGACATGCATTTCGGATTCGGCTAATCTACCTAAATCCGAGAC	CCTCCTAAGTTTCGAGCTGGACTCAGTGTCGGTGCCCATTTAAGTAATGCTCTGCTTCATT
CCTCCTAAGTTTCGAGCTGGACTCAGTGTGGCGAAATGTTTGGAGGGTGGAAAATTAGTCA	TTACACTCGGACCTCGTCGACATGCATTGGTGTAGAATTTGCATCACTCCTAGGTTCTGC	CCTCCTAAGTTTCGAGCTGGACTCAGTGTCCTTTAGCCCATCTTTGATCACGTAGACTTGT
CCTCCTAAGTTTCGAGCTGGACTCAGTGTCAAGCGCTCAATCTTCTACTGTATGTGCTCAA	TTACACTCGGACCTCGTCGACATGCATTCCGTCTTTCCATATTTGTTTTCCACGTCCGTG	CCTCCTAAGTTTCGAGCTGGACTCAGTGTGGGGTCTTGGTCTTATGATTTGTGCAACTTCT
CCTCCTAAGTTTCGAGCTGGACTCAGTGTGTAACAATGTGGTAGCGATGTCATGTCATTCC	TTACACTCGGACCTCGTCGACATGCATTCTTGAGCTGTGTTGCTACTCAACTCCAACTTC	CCTCCTAAGTTTCGAGCTGGACTCAGTGTCATTGAGCTCTCATTAACCCAATTTTGCTGGC
CCTCCTAAGTTTCGAGCTGGACTCAGTGTGGTGTTAAACGCTGTTGGATTAGAGAAAGCGA	TTACACTCGGACCTCGTCGACATGCATTCAGATCTCTTAATGGAGGGACTGGTAATGGTG	CCTCCTAAGTTTCGAGCTGGACTCAGTGTGACTCTTTAAGAGCAAATAACGTTTGCGAGGG
CCTCCTAAGTTTCGAGCTGGACTCAGTGTCCTCTTCAGTATTCAGCTACTTAGTCAAGTCG	TTACACTCGGACCTCGTCGACATGCATTGGGGTTACAAAGTCAGAGCAACTGTACGTTCA	CCTCCTAAGTTTCGAGCTGGACTCAGTGTGATCCATAAAGTATTCAGTCTCCTACCTGAGC
CCTCCTAAGTTTCGAGCTGGACTCAGTGTGCAGCCATATACTTTTGGCTTTTCAGCTTAGG	TTACACTCGGACCTCGTCGACATGCATTCATGTCCAGCCAAATAACCTGAAGCACCTGTT	CCTCCTAAGTTTCGAGCTGGACTCAGTGTGCGAGGAATGTGGAAAAGTATTGCGGCTTATT
CCTCCTAAGTTTCGAGCTGGACTCAGTGTTCAGCCGTCTTTTTCTCATCATTATGCCCACA	TTACACTCGGACCTCGTCGACATGCATTGTACAGGGTACAGAAGCAGTTTTTGAAGCTGC	CCTCCTAAGTTTCGAGCTGGACTCAGTGTGCAGGATAGCTATTTGGATTTGATCACCTAGC
CCTCCTAAGTTTCGAGCTGGACTCAGTGTGGCATGTTAAGTCGATAGGTTCAGAGTGTAAG	TTACACTCGGACCTCGTCGACATGCATTGAACTCATAAAATATGGGCGAGGGAGGAGTGA	CCTCCTAAGTTTCGAGCTGGACTCAGTGTACCCTAATAGGAGAAGGCGATACTCATACAGA
CCTCCTAAGTTTCGAGCTGGACTCAGTGTTCAGATCTAGTTCAACCAGTTCATGTCGAAGC	TTACACTCGGACCTCGTCGACATGCATTCTCATAATACCTGCTGTACAGGGTACAGAAGC	CCTCCTAAGTTTCGAGCTGGACTCAGTGTCTATCCACCAATTTACTTTTTCCAGTGGTGGG
CCTCCTAAGTTTCGAGCTGGACTCAGTGTGGGAGAGGTTGATCTATTGGTTGACTTTAAGC	TTACACTCGGACCTCGTCGACATGCATTAAGCCTTGCATTTGGTCAAGCGAAGATCACTC	CCTCCTAAGTTTCGAGCTGGACTCAGTGTGGTTTTTCGCTGGCTATCTCTCTATTTCAGTG
CCTCCTAAGTTTCGAGCTGGACTCAGTGTCTACACAGGAAGCCTACAAAGGAGCTAAAAAG	TTACACTCGGACCTCGTCGACATGCATTGCTGCTATGCATTGCGAATTAAGCTGTTCACC	CCTCCTAAGTTTCGAGCTGGACTCAGTGTCCACCTCTTATCTAAGTCTTTAACTTCCCCCA
CCTCCTAAGTTTCGAGCTGGACTCAGTGTGTTTCCTTATGAAGGGCGGAAAGTTCCTATTG	TTACACTCGGACCTCGTCGACATGCATTGAGGAAGCTTGCTAGTGGCTTACAGATTACCT	CCTCCTAAGTTTCGAGCTGGACTCAGTGTCCTCGATATATCGGCCAACCCTAAGTTATACA
CCTCCTAAGTTTCGAGCTGGACTCAGTGTGTGAAGTCACAAATCTCAAAGAGAGCGCAAAG	TTACACTCGGACCTCGTCGACATGCATTGAAGCAGAACTGAACTGAGAACTCATAGCTCC	CCTCCTAAGTTTCGAGCTGGACTCAGTGTAAATTACAAGGGCGCGATGGATTTTCTCGAAG
CCTCCTAAGTTTCGAGCTGGACTCAGTGTCGAAATGAGATTGCTAAAGAAGGAGAGAAGGG	TTACACTCGGACCTCGTCGACATGCATTGGAATCCCGCAAGAAGTCTTACCAAGAAAGAG	CCTCCTAAGTTTCGAGCTGGACTCAGTGTTATTTTAGAATGTATGCTCCCCGAATAGGGGC
CCTCCTAAGTTTCGAGCTGGACTCAGTGTAAGAGAGCGCTTAAGAAATAGGGAGAGTTTGC	TTACACTCGGACCTCGTCGACATGCATTTTGCTACCTTATGGCGAATTGTGGCTGTCGTA	CCTCCTAAGTTTCGAGCTGGACTCAGTGTATTCTTAGGTCGGTTAGCGGTTAGCGAATTTC
CCTCCTAAGTTTCGAGCTGGACTCAGTGTAGTGGGCCTGTGTTCCCATCATGCATTATATA	TTACACTCGGACCTCGTCGACATGCATTTCCAGGAGCTGCTTTACAATCCTTCTAGCGAA	CCTCCTAAGTTTCGAGCTGGACTCAGTGTGTACTACCTAGGAATACGGCTCTGTACTTTTG
CCTCCTAAGTTTCGAGCTGGACTCAGTGTCGAGATGGTAACGGCTTTTATGAAGCGATTTG	TTACACTCGGACCTCGTCGACATGCATTTGCTCGGTTAAGGACTTTATTGGTTTCCGCTC	CCTCCTAAGTTTCGAGCTGGACTCAGTGTGGAAAAGGTCTTAATATATGCGATGAGCTGGC
CCTCCTAAGTTTCGAGCTGGACTCAGTGTTACACACCTGCCTCTTAATACAAGCTCTGATG	TTACACTCGGACCTCGTCGACATGCATTCAAGCGCACTTTATATGAAGCTTTTGGCAGCG	CCTCCTAAGTTTCGAGCTGGACTCAGTGTGCATCTTAAACAGTGGCATACTACTATCCTCG
CCTCCTAAGTTTCGAGCTGGACTCAGTGTTCTACCCTTTGAAAATCCACATGAGGATAGGC	TTACACTCGGACCTCGTCGACATGCATTATACCAGGATTTAACGTCCTCGAGGGCATTCA	CCTCCTAAGTTTCGAGCTGGACTCAGTGTCTGCCTAAAATGTGGGTTCATAGTCTAAGTGG
CCTCCTAAGTTTCGAGCTGGACTCAGTGTACCAGGAGTTGAGAAGATCATTGTCAGAAGGT	TTACACTCGGACCTCGTCGACATGCATTCTGTGACATATGCTGCTGATTAGTTGGAGAGG	CCTCCTAAGTTTCGAGCTGGACTCAGTGTGCTCCTCGTCATCTGTCTCATCTTTGATACTA
CCTCCTAAGTTTCGAGCTGGACTCAGTGTTCTGTAACTGAGATTAAGCTAAGCTCGACAGC	TTACACTCGGACCTCGTCGACATGCATTCCACTTCCTCTTTGGATTCTAGCCGTATCTCA	CCTCCTAAGTTTCGAGCTGGACTCAGTGTGGCTTTTTACTGGAAGCATCGAAAATAAGGGC
CCTCCTAAGTTTCGAGCTGGACTCAGTGTCAACTGTGGACTATAGGGCGCCAAGAAAATAT	TTACACTCGGACCTCGTCGACATGCATTGCTCTTGCACTATGCGAATCTCTTTCTCCTTC	CCTCCTAAGTTTCGAGCTGGACTCAGTGTCCTGCAAAAAGCAAGACCAAGATCTAAAGCGA
CCTCCTAAGTTTCGAGCTGGACTCAGTGTCTGCTTGTAAGTTTTCGATAACGCAAGGATCC	TTACACTCGGACCTCGTCGACATGCATTTGTTCTCTACTAGGAGGTCTAGCAACCTCTCT	CCTCCTAAGTTTCGAGCTGGACTCAGTGTCAAGAGAGTTGAGAAATTTCTCCATTGCACCC
CCTCCTAAGTTTCGAGCTGGACTCAGTGTCCCTCACATAGGCAGCTCTCTTTTTAATAGTC	TTACACTCGGACCTCGTCGACATGCATTGTGCAACCAAGGTTAATATCCACCTCCTCCTT	CCTCCTAAGTTTCGAGCTGGACTCAGTGTACAGAGGGAGCCTACTAAGAAGCTAAAAAGAG
CCTCCTAAGTTTCGAGCTGGACTCAGTGTCAAGCAGATATTACTTGCTTGGGAGGTGATAG	TTACACTCGGACCTCGTCGACATGCATTGAGCATGCATACCTAACTAACTGCAGATGGAG	CCTCCTAAGTTTCGAGCTGGACTCAGTGTGGCATAATTTAAGCACTAATAGCGAGGACCCT
CCTCCTAAGTTTCGAGCTGGACTCAGTGTGGAGATCGAGTGACGCAAAGCTTCAAAAGAAT	TTACACTCGGACCTCGTCGACATGCATTAGCAGCAGCTGATAATAATGCAGCTCCTGCTA	CCTCCTAAGTTTCGAGCTGGACTCAGTGTGGCTTGTATTTAAACGAGGTGAGTTAGCATGC
CCTCCTAAGTTTCGAGCTGGACTCAGTGTGGGATCTTGATTAGCTATCTTCCTTAAGCGCA	TTACACTCGGACCTCGTCGACATGCATTCGATTGAGCAGACTACTGCAAAAACTCCGCAT	CCTCCTAAGTTTCGAGCTGGACTCAGTGTGTTTATTTACCTTGACCTGAACAGCAGACTGC
CCTCCTAAGTTTCGAGCTGGACTCAGTGTGCCATAAGAAACTGAAACCGCAAAATTGCCTG	TTACACTCGGACCTCGTCGACATGCATTAAGAGGACTTCTCAACAGTCAGTAAGTGCAGC	CCTCCTAAGTTTCGAGCTGGACTCAGTGTGGCGTAAAATGGTTTCATAATCTTGACTGCCC
CCTCCTAAGTTTCGAGCTGGACTCAGTGTTGGAGCATGTTGCTTTGGTAAAAAATCGCAGC	TTACACTCGGACCTCGTCGACATGCATTGACGATCCTTTTCCTACTTCAGACACAACCAC	CCTCCTAAGTTTCGAGCTGGACTCAGTGTCGATATTCGCCGATGAGGGATATAGACAAACA
CCTCCTAAGTTTCGAGCTGGACTCAGTGTGATTTTCTCCCTGTAGCAAGCCCCATTATCAT	TTACACTCGGACCTCGTCGACATGCATTCGATATGGCTTTTAGTGGCTAGTCTGCTTTGC	CCTCCTAAGTTTCGAGCTGGACTCAGTGTGCCTGGGTCGTAAATTTCTAGATCAGTTTGCT
CCTCCTAAGTTTCGAGCTGGACTCAGTGTGCTTTCCCTTCTTAGCTTGAACCAGCTTAAAC	TTACACTCGGACCTCGTCGACATGCATTGGGGATGAAGAAGTGGACGATGAAGATGAAGA	CCTCCTAAGTTTCGAGCTGGACTCAGTGTCGATGAGTTAGAAATCGTCCCAAGTGTAGAAG
CCTCCTAAGTTTCGAGCTGGACTCAGTGTGGATGGATTCCGATTTGGATACTTCCAACTTC	TTACACTCGGACCTCGTCGACATGCATTCCATCATCGTCGTCATCGTCATCCTCAATTTC	CCTCCTAAGTTTCGAGCTGGACTCAGTGTTGCGCGATTTTGAGTAATCCATAGAAGAGCGA
CCTCCTAAGTTTCGAGCTGGACTCAGTGTGAGCACGAAGACCTATCTCAGTGATGAGTAAA	TTACACTCGGACCTCGTCGACATGCATTGCATGGATGGAGAAGAAGAGGATGATGAAGGA	CCTCCTAAGTTTCGAGCTGGACTCAGTGTGAGAGAATGCCTTGAGACAGTCTAATCCATCA
CCTCCTAAGTTTCGAGCTGGACTCAGTGTAGTTCTATGTTATAGGCATCGCATTGGGTTCG	TTACACTCGGACCTCGTCGACATGCATTCTACGATCATCTTCTTCTCCATCCCCTTCCAT	CCTCCTAAGTTTCGAGCTGGACTCAGTGTCTGACCAAGGAGATGGAGTCTTAGTAATCATC
CCTCCTAAGTTTCGAGCTGGACTCAGTGTGCTCTCCTTTACATAGTCACAAAAAGCACCTC	TTACACTCGGACCTCGTCGACATGCATTTGCTTAGCGCGCATTTCTTCATAGTTTCCTGC	CCTCCTAAGTTTCGAGCTGGACTCAGTGTCTGGGCTTGCAAAATAACACGGGATTCAAGTA
CCTCCTAAGTTTCGAGCTGGACTCAGTGTGGTTATTGACGATTATCTCTCAGCAGTACCAG	TTACACTCGGACCTCGTCGACATGCATTGCTCCTTCGCTAGTAGCTTAGTAAACTGGTTG	CCTCCTAAGTTTCGAGCTGGACTCAGTGTCCAAGCTATCAAACGTCTGGTTGATCTACTGA
CCTCCTAAGTTTCGAGCTGGACTCAGTGTGCTGCTGCGAAATCTGTTATCTATGAGCTTTG	TTACACTCGGACCTCGTCGACATGCATTCCTTCTACTGTGTCTTAGAGGAATTCTGGAGC	CCTCCTAAGTTTCGAGCTGGACTCAGTGTGTTACCTAAATCAGGCTGGTATAGATTGCAGC
CCTCCTAAGTTTCGAGCTGGACTCAGTGTACATCTCTCTCGGCTTTGCAGGAATTGGAATA	TTACACTCGGACCTCGTCGACATGCATTTGGGTGACTCAAACAACGTTTACTCAACCCAC	CCTCCTAAGTTTCGAGCTGGACTCAGTGTGTGCCCAGTTACTCTTCTCTGGTATTCATCTT
CCTCCTAAGTTTCGAGCTGGACTCAGTGTTGTGAACATGAAAACCCAAGGAACAATCCACC	TTACACTCGGACCTCGTCGACATGCATTCTAATTCATGGAAGGTGCAACCTTAGGGAAGC	CCTCCTAAGTTTCGAGCTGGACTCAGTGTGAGAAGTTTAGCGATACAAGGCTGCTAAATCC
CCTCCTAAGTTTCGAGCTGGACTCAGTGTGTCTTTGCTAGCTGACAAACAGTGAAACCTCT	TTACACTCGGACCTCGTCGACATGCATTCCTGAGTAAGGAACTACATCTCTCTCAAGTGG	CCTCCTAAGTTTCGAGCTGGACTCAGTGTGAACGCTTCACAAAAAGTAGATGCCAACACGT
CCTCCTAAGTTTCGAGCTGGACTCAGTGTGCGTCTAAAGCTTCTATAGGGTGCTTCAATCA	TTACACTCGGACCTCGTCGACATGCATTTATTGAGCTGAGATGGTTGGGCATGTTTGTGC	CCTCCTAAGTTTCGAGCTGGACTCAGTGTGGCTATTTAAAGACATGAACACAAAGGCCCTC
CCTCCTAAGTTTCGAGCTGGACTCAGTGTGGTTTGTTGACTCTTGTGCCACTGTTTCTAAC	TTACACTCGGACCTCGTCGACATGCATTGTCCTATAGGGGGTACCTGTAAAGAAGGCATA	CCTCCTAAGTTTCGAGCTGGACTCAGTGTGGAGAGTGCAAAATGGGAAAGATACTACACTG
CCTCCTAAGTTTCGAGCTGGACTCAGTGTGACTTTGTATTATCCACCTCAAAGGCGTGATG	TTACACTCGGACCTCGTCGACATGCATTTGCCTTCTTTACAGGTACCCCCTATAGGACAA	CCTCCTAAGTTTCGAGCTGGACTCAGTGTCCAAGGATGATCTCACAAATCAGACTAGAGAG
CCTCCTAAGTTTCGAGCTGGACTCAGTGTTGGCAATTAGCACAAGGTATGGAGTTATAGCC	TTACACTCGGACCTCGTCGACATGCATTGTGCAAGCTTTCCTTTGGTGTATCCTGTCACA	CCTCCTAAGTTTCGAGCTGGACTCAGTGTTGATTTTCCAAAGAAGGAGCAACCACAGGTCA
CCTCCTAAGTTTCGAGCTGGACTCAGTGTGGTGCCTCTTTTAGCTCTAGTAAATAGCTCCA	TTACACTCGGACCTCGTCGACATGCATTCTCTCCACCCACAAATCCTTAAGGTGAAGCTT	CCTCCTAAGTTTCGAGCTGGACTCAGTGTGAGGCTAATCGGATAAAAATGATTGGTGGGAC
CCTCCTAAGTTTCGAGCTGGACTCAGTGTCCTCTAAGCTTAACCGAGCTTAATCAACTGGA	TTACACTCGGACCTCGTCGACATGCATTCCGGGAACTTCATCATCTCCGATTTCTTGATC	CCTCCTAAGTTTCGAGCTGGACTCAGTGTGGCTTACATTCAACAGCAGATCAACATCTCCA
CCTCCTAAGTTTCGAGCTGGACTCAGTGTTAAGGAGGTCAACTCCTTTAAGTAACGCAGCT	TTACACTCGGACCTCGTCGACATGCATTTTTTATCCATTAACTTGAAGAGGGCGAGGACC	CCTCCTAAGTTTCGAGCTGGACTCAGTGTGCAGATGTCAACATATAGTACCTATGTACGCC
CCTCCTAAGTTTCGAGCTGGACTCAGTGTGAGGCTATTGTGGAGCATATAGAGACTACTTC	TTACACTCGGACCTCGTCGACATGCATTTATTAGTACCAACCACATAGGCGATGAAGGAG	CCTCCTAAGTTTCGAGCTGGACTCAGTGTCACAATAAGCTCATCCCAACTCTCAGATCAAG
CCTCCTAAGTTTCGAGCTGGACTCAGTGTCCGCACTTTTATCTCCTATTTACCCAAGATGC	TTACACTCGGACCTCGTCGACATGCATTGCAGTGCCTAAACCAAACCCAAATTATTCAGC	CCTCCTAAGTTTCGAGCTGGACTCAGTGTCAAGGAAAACGCAGCAATTAGGATAACTCTCC
CCTCCTAAGTTTCGAGCTGGACTCAGTGTGCACACTGTACAAATTTAGGGTGGACAGATAC	TTACACTCGGACCTCGTCGACATGCATTTTATGTCCCAAGAGCTTTGAAACTCTTGTGGC	CCTCCTAAGTTTCGAGCTGGACTCAGTGTGCACAAGTGCTAATCTCTTACTGCACCTTAGT
CCTCCTAAGTTTCGAGCTGGACTCAGTGTTTGGTAACCTACACTTCACCCATATTCAGCCT	TTACACTCGGACCTCGTCGACATGCATTCTGGGTAACAATGGCTTTAACACCAGTTTTGG	CCTCCTAAGTTTCGAGCTGGACTCAGTGTGCGAGGGTATAACTACTGAACGCTTAGATGAA
CCTCCTAAGTTTCGAGCTGGACTCAGTGTCCCAAGTGTTATCTTCCCCTACATTGTTGTAG	TTACACTCGGACCTCGTCGACATGCATTGGGATTTGTTGTCTTGTTAGGAGGACTGTTTG	CCTCCTAAGTTTCGAGCTGGACTCAGTGTGAGTATCAGGGCTATCTCAAGCGATAATATCC
CCTCCTAAGTTTCGAGCTGGACTCAGTGTTTGCAAACTTCCTCAAGAGATCCTTAGCAAGG	TTACACTCGGACCTCGTCGACATGCATTCAAAGAAAAAGGACTAGCAAAATGCTCCTGGC	CCTCCTAAGTTTCGAGCTGGACTCAGTGTCCATTCCTTTGCTTGAGCACTTTGTGTCATCA
CCTCCTAAGTTTCGAGCTGGACTCAGTGTGCCTCAGTCATTTTTTGCTGCTTTCTCTTTGC	TTACACTCGGACCTCGTCGACATGCATTGTTGCAGTTATTAGATTCTGCGGTCCTCAAAG	CCTCCTAAGTTTCGAGCTGGACTCAGTGTTGCTCTTTCTGCTTTTGCTGCTTTGCTGCTAT
CCTCCTAAGTTTCGAGCTGGACTCAGTGTGTAGATGCCACTATCTATGCAGTGTCTAAACC	TTACACTCGGACCTCGTCGACATGCATTGCAAAATCAGTATTGCAAAGTACTGAACCCCC	CCTCCTAAGTTTCGAGCTGGACTCAGTGTCACAATTAACCAAAGCAACACCACAGCCACAA
CCTCCTAAGTTTCGAGCTGGACTCAGTGTAGGTAGTTACAGAAGTCGCAATGACACTTCTC	TTACACTCGGACCTCGTCGACATGCATTGAAGGCCTTTTAAGAGACTGGGTAGTAAAGCA	CCTCCTAAGTTTCGAGCTGGACTCAGTGTCAAAGAAGGTGATATTCTTCCTGGATTGGCTG
CCTCCTAAGTTTCGAGCTGGACTCAGTGTGTTGGTGGAGAGGACCCATTGACAAAGAAAAT	TTACACTCGGACCTCGTCGACATGCATTGCTATAACTACAGCTCTAAGACCATAGCACAC	CCTCCTAAGTTTCGAGCTGGACTCAGTGTTCTTCATAGTAGTCTTCAGCATCAGCAGCAAC
CCTCCTAAGTTTCGAGCTGGACTCAGTGTATCTTGACCCAAAGCCCATACTTCTTAACCTG	TTACACTCGGACCTCGTCGACATGCATTGCCTGATTTAAAGCTGACTTTAGGAGATTCGC	CCTCCTAAGTTTCGAGCTGGACTCAGTGTGAGCAGACCTCAAGAAAAGGCTTTTAGGTGTA
CCTCCTAAGTTTCGAGCTGGACTCAGTGTGAGCAAGATGTAGAAGACAGTATCCCTTTCCA	TTACACTCGGACCTCGTCGACATGCATTCCTGTTTAGCTAGTCATCAGTGTGTTCTCCTA	CCTCCTAAGTTTCGAGCTGGACTCAGTGTGTAGTGGTAGTAGTGGTGGTATCGAAATATCG
CCTCCTAAGTTTCGAGCTGGACTCAGTGTCCTCTCCGATCGTTTCTACTAGAAGGTTTCAT	TTACACTCGGACCTCGTCGACATGCATTATGATGGGATTCAAAACAACGGCGTTACCAAC	CCTCCTAAGTTTCGAGCTGGACTCAGTGTAACCATGGGTGAGGCAATTTTCTGTATCCATC
CCTCCTAAGTTTCGAGCTGGACTCAGTGTGGAATATCTCTGACCTCACATTCCAACTTAGC	TTACACTCGGACCTCGTCGACATGCATTGTACTATCCTGTCATTCTTTAAGCCTGGTACG	CCTCCTAAGTTTCGAGCTGGACTCAGTGTGTGAAGCTAAAAGATTCGTGGTTGCTCATTGC
CCTCCTAAGTTTCGAGCTGGACTCAGTGTCCAGAAGCTATCAAATGCCTAATACACCAAGC	TTACACTCGGACCTCGTCGACATGCATTGCAGTGGAGTTATAAGCAAAATCGATACCACC	CCTCCTAAGTTTCGAGCTGGACTCAGTGTGTAGACGACTGGTTATAATACGCCAAAAAGGC
CCTCCTAAGTTTCGAGCTGGACTCAGTGTCTGTCTTAATTAGAAAAAGACTGGACCAGCCC	TTACACTCGGACCTCGTCGACATGCATTGCTCAAGGTTTGGTTGCTTAAGACGTTTTCTC	CCTCCTAAGTTTCGAGCTGGACTCAGTGTGAGAGTTTTATCACCCACCATTGTCAGAAAGG
CCTCCTAAGTTTCGAGCTGGACTCAGTGTCAGCTTAGATTACTCAGGCCTTATCAATCTCC	TTACACTCGGACCTCGTCGACATGCATTCCACTTAATATGACCGAGATGTCTGTCTGGAA	CCTCCTAAGTTTCGAGCTGGACTCAGTGTGTCCAAGCTTTTCGACTTATTGGCAGACTGTA
CCTCCTAAGTTTCGAGCTGGACTCAGTGTAGAAGGCTAATTTCTGGCTTCATAGTTCCCTC	TTACACTCGGACCTCGTCGACATGCATTGTGAGCAAGGGTAGTGTGAATATTCTTTCACC	CCTCCTAAGTTTCGAGCTGGACTCAGTGTTGACCTCTAAAGCTTGATTGAGCTTGATCCCT
CCTCCTAAGTTTCGAGCTGGACTCAGTGTGGCACTCAGAGCCATTTGTCTTTGAAGGTTTA	TTACACTCGGACCTCGTCGACATGCATTAGCCACAAGTAGTAGCTGTACTCATTACGAAG	CCTCCTAAGTTTCGAGCTGGACTCAGTGTAGGAGCCAGAAAACCCCTAACAATCCTTTCTA
CCTCCTAAGTTTCGAGCTGGACTCAGTGTGGACAGAATGCGACATGGTTATCAGTTAATCG	TTACACTCGGACCTCGTCGACATGCATTACTGAGAGGAATAAGGACTCTGTAGCTCTTTG	CCTCCTAAGTTTCGAGCTGGACTCAGTGTGCAGTTCATGAGACCTCCATCTCTTTTTATCG
CCTCCTAAGTTTCGAGCTGGACTCAGTGTCTAGGGCTTGCAAAACCGTTTATGCCTATTTC	TTACACTCGGACCTCGTCGACATGCATTGCGATTGAATCCATTCGCGTTACATTGCTAAC	CCTCCTAAGTTTCGAGCTGGACTCAGTGTCACTAGATGGTACTAGTGAAAGCTGGTTCAGA
CCTCCTAAGTTTCGAGCTGGACTCAGTGTAGGAGTTAGCATTCTTAAGCTGAAACCAGAGC	TTACACTCGGACCTCGTCGACATGCATTCTCATGTAGGTGTTGGTGATGTAACAGGAGTT	CCTCCTAAGTTTCGAGCTGGACTCAGTGTGAATCTTAATTCTAGCCATTTTACCAGCGGGC
CCTCCTAAGTTTCGAGCTGGACTCAGTGTTCCTGATAATCCCCAGTAGGATATGGAGTAAC	TTACACTCGGACCTCGTCGACATGCATTCTGAAATCCAGAAGCAGTACATTGCAATCACG	CCTCCTAAGTTTCGAGCTGGACTCAGTGTGCAACTGGACTTCTCTTAACATAAATCAGCCC
CCTCCTAAGTTTCGAGCTGGACTCAGTGTGGCGATAGAACTTTTCGGAGAATTAGCCAAAC	TTACACTCGGACCTCGTCGACATGCATTGTAATGAGCATTGCCACAACTTGTGGATATCC	CCTCCTAAGTTTCGAGCTGGACTCAGTGTGCTTTGGTTTGCCAGACCAAAGTTACTAAACC
CCTCCTAAGTTTCGAGCTGGACTCAGTGTGACCAAAATCCTGCCTACATGAAATCAGACCA	TTACACTCGGACCTCGTCGACATGCATTACTTGCCGATTATCTTTTCATACCAATCGGGG	CCTCCTAAGTTTCGAGCTGGACTCAGTGTAGAATTAGCTGATCCTATAACATGCTGCGGCT
CCTCCTAAGTTTCGAGCTGGACTCAGTGTCTTTCTTACTCTCCAGTAAGCTAGTGATCAGG	TTACACTCGGACCTCGTCGACATGCATTGCTTCATGGCTGATAAAAGTTCCTGCTCCATA	CCTCCTAAGTTTCGAGCTGGACTCAGTGTCTGGTTGCATTCGCATACAAATGCTTCATTGG
CCTCCTAAGTTTCGAGCTGGACTCAGTGTACTAGCTAGCTTAACGCTTCTTCTGATTGTGC	TTACACTCGGACCTCGTCGACATGCATTCTGAGCACACCTTAGTTTAACAAACAGAGCCA	CCTCCTAAGTTTCGAGCTGGACTCAGTGTCCAAGCACAAGGGTTTACTTCCACTTAATTCC
CCTCCTAAGTTTCGAGCTGGACTCAGTGTGATTCCTCAACTGTCAGATCTATACGCCAATC	TTACACTCGGACCTCGTCGACATGCATTAGCTTGAACAATACTTGGAGGAGGTAGACTCT	CCTCCTAAGTTTCGAGCTGGACTCAGTGTACTATGCCAGCTTCTCTTTTACATGGGTTGAG
CCTCCTAAGTTTCGAGCTGGACTCAGTGTGCCACTTAATAAGGCTGAGGTTACAGTAGCTA	TTACACTCGGACCTCGTCGACATGCATTGTGCTTCTAGAACTATAGAAACATCACCAGCG	CCTCCTAAGTTTCGAGCTGGACTCAGTGTACCTCCTTTATGCTTGGATGAAGTATCAAGCC
CCTCCTAAGTTTCGAGCTGGACTCAGTGTAAGGCTGAAAACTAAGTAGCGCTACTGCTGTA	TTACACTCGGACCTCGTCGACATGCATTGAACATGTTATGTCAAAGCCCAGACTGATTGC	CCTCCTAAGTTTCGAGCTGGACTCAGTGTGAGAGGTTGTTAGCAAATTAAGGACTGGGTGA
CCTCCTAAGTTTCGAGCTGGACTCAGTGTGGAGGTTGGTGAGAATTAATCAGTAACTACAG	TTACACTCGGACCTCGTCGACATGCATTCCATCTGTAGGAGGATAAACATCACCAAAGCT	CCTCCTAAGTTTCGAGCTGGACTCAGTGTGCTCTTCCTAAGTCTCAGATGCTAGAAATCCT
CCTCCTAAGTTTCGAGCTGGACTCAGTGTTACTGAGTTGGCGCTCATTGTCAGTATCTATT	TTACACTCGGACCTCGTCGACATGCATTGCCTATGATTTTGGTTTGATTGCTACCCAGTC	CCTCCTAAGTTTCGAGCTGGACTCAGTGTTCAGCAATTGAAAAGTGCTTAGGATCGTGGGT
CCTCCTAAGTTTCGAGCTGGACTCAGTGTTCGATAAGGATCACTGCTCACGAATTGTCATT	TTACACTCGGACCTCGTCGACATGCATTGATTTCATCGTTGGATATCCACAAGTTGTGGC	CCTCCTAAGTTTCGAGCTGGACTCAGTGTACAACTCCTAACTAGCTACAATGAACCTCCTC
CCTCCTAAGTTTCGAGCTGGACTCAGTGTTACTAGGTCATTGCAGCTTTCAGAAAAGTCCT	TTACACTCGGACCTCGTCGACATGCATTTGGGTTTGGTATGCTTACAACATCTCAGTTCC	CCTCCTAAGTTTCGAGCTGGACTCAGTGTCATTTCATCACTTCCCCTTCTCTTTTTGAGGG
CCTCCTAAGTTTCGAGCTGGACTCAGTGTGCCTACACAAACTAGGTGAAGATATGCAAATC	TTACACTCGGACCTCGTCGACATGCATTCACATGCAAAAAACCTACAAGCATGCCTAGTG	CCTCCTAAGTTTCGAGCTGGACTCAGTGTCAGGCCTATAGTCATACTTTCTCCACTTCTGA
CCTCCTAAGTTTCGAGCTGGACTCAGTGTTCTACTAGATTTAATTGAGGAGAAGGTCCACC	TTACACTCGGACCTCGTCGACATGCATTGAGAACGCCATACTTCAAACAAGGATTGTTGG	CCTCCTAAGTTTCGAGCTGGACTCAGTGTATAAGTAATGGGGTCGTAGAAACACCATCCAG
CCTCCTAAGTTTCGAGCTGGACTCAGTGTGAATTCAACTCTAGCGCTACATTACCCAAACT	TTACACTCGGACCTCGTCGACATGCATTACTTGCCCATTATCTTTTCATACCAATCGGGG	CCTCCTAAGTTTCGAGCTGGACTCAGTGTGCCCTATTCTTACCCTCAACAACTGCAAACAA
CCTCCTAAGTTTCGAGCTGGACTCAGTGTGATACTAGAAACTTCTTGATACCTTCGTCACC	TTACACTCGGACCTCGTCGACATGCATTGTTCCTTCTCTCAGAAAAGTTTCTGTAAGGGC	CCTCCTAAGTTTCGAGCTGGACTCAGTGTCTAGGTTTTCTAAGTCAACACAGTCACGGTAG
CCTCCTAAGTTTCGAGCTGGACTCAGTGTGATGAGATATTCAAAGAGAGCAAGAGAGGATG	TTACACTCGGACCTCGTCGACATGCATTAAAGCAAAACCATAGCCCAGTACATCATCACC	CCTCCTAAGTTTCGAGCTGGACTCAGTGTTGGAAAATGATGAAGGCTTGTGTCAGGAGTAG
CCTCCTAAGTTTCGAGCTGGACTCAGTGTGACCTGCTTCTAACTTACCCTTAAATAAGAGC	TTACACTCGGACCTCGTCGACATGCATTGAACATGTTATGTCAAAGCCCAGACTGATTGC	CCTCCTAAGTTTCGAGCTGGACTCAGTGTGGATTACCCCATTTATCATGAGATTACCCAGG
CCTCCTAAGTTTCGAGCTGGACTCAGTGTGACGATCGTAACTCTCAAAACTCTATTCTCGA	TTACACTCGGACCTCGTCGACATGCATTCCATCTGTAGGAGGATAAACATCACCAAAGCT	CCTCCTAAGTTTCGAGCTGGACTCAGTGTCTAAAGTAGGGTCAAGAAGAGGAAGTATCAGG
CCTCCTAAGTTTCGAGCTGGACTCAGTGTGGGTTAGAAGGAATCACGTAGTTTCTAGTTTC	TTACACTCGGACCTCGTCGACATGCATTGGGGTTGGAGATGTTACTGGAGTTAACTTAAG	CCTCCTAAGTTTCGAGCTGGACTCAGTGTGTAAGCGTGGCTAAGTATTACTATCGGTCTGA
CCTCCTAAGTTTCGAGCTGGACTCAGTGTCATCAGACTCTCACGATTTCCTAATGCATCAT	TTACACTCGGACCTCGTCGACATGCATTGGGGAGCAGGAACTTTAATCATCCAAGAAGAA	CCTCCTAAGTTTCGAGCTGGACTCAGTGTTGGCTAGCCAAAATGCAGTAGGATTTGACAAC
CCTCCTAAGTTTCGAGCTGGACTCAGTGTGAGTCTGGTATGGCTTTAAATTTGGCTAGATC	TTACACTCGGACCTCGTCGACATGCATTTAAGCAGAAGGAGAAAACCGTTTCTCTGGAAG	CCTCCTAAGTTTCGAGCTGGACTCAGTGTTCCAAGTCTTCTCAATGTGAGAGTATCACAGG
CCTCCTAAGTTTCGAGCTGGACTCAGTGTTTTCCCAAATTCCAGATTCCCAGAACACTTGT	TTACACTCGGACCTCGTCGACATGCATTGTCTTAGCTCTTGCAGAGACTTTTCTGAGACT	CCTCCTAAGTTTCGAGCTGGACTCAGTGTTTACCCACTTAGGAGAGAATTTACAATCGGGG
CCTCCTAAGTTTCGAGCTGGACTCAGTGTTTCGCAAAATAGTCGCAGAAGACTAAGAAACC	TTACACTCGGACCTCGTCGACATGCATTAAGGCTATGTTTTGCTGGGCTATGGTCTTACT	CCTCCTAAGTTTCGAGCTGGACTCAGTGTGTAACAGCTGAGGTTGTTATAGCTGCTATTGC
CCTCCTAAGTTTCGAGCTGGACTCAGTGTCCGGTATCTTACTCATAAGCGAATTAGTACCT	TTACACTCGGACCTCGTCGACATGCATTGCTCCTGGTTCTAGTACTCTAATCACCTTCTT	CCTCCTAAGTTTCGAGCTGGACTCAGTGTGGATAGCAATCTATGCACTTACTCCATACCTC
CCTCCTAAGTTTCGAGCTGGACTCAGTGTGAACTCACCAATCATAATGCTGAAGAACTAGG	TTACACTCGGACCTCGTCGACATGCATTATAGGATCTATAAAAGGCTAAGCAAGCAGCGC	CCTCCTAAGTTTCGAGCTGGACTCAGTGTCAAGTGGTCTTTTAGCCAATTCAGTCCAATGC
CCTCCTAAGTTTCGAGCTGGACTCAGTGTCAACCGTAGATCTATCTGATATAGTGAGAGTC	TTACACTCGGACCTCGTCGACATGCATTCCCACCTTAAACTTGAGTTAGAGAGTAAGGAG	CCTCCTAAGTTTCGAGCTGGACTCAGTGTCCTCAAAAAGAACAAGCTCATAGCAACTCTCC
CCTCCTAAGTTTCGAGCTGGACTCAGTGTAGTCAGAGGAACCATCAATAGAGAAGGAAGTT	TTACACTCGGACCTCGTCGACATGCATTCTCCTTTGAAAGCAAGCTCATCTCATATCAGC	CCTCCTAAGTTTCGAGCTGGACTCAGTGTCTTACCCACGTTGTTGATGATTAAGCCGAGAT
CCTCCTAAGTTTCGAGCTGGACTCAGTGTGTAGCAATCTGATGGGTTAAGATAGAGAGGAA	TTACACTCGGACCTCGTCGACATGCATTGGATATCCACATGTTGTAGCTATGCTCATCAC	CCTCCTAAGTTTCGAGCTGGACTCAGTGTTAGAAACTGAAGAGGTGGCGATACAACAAGCT
CCTCCTAAGTTTCGAGCTGGACTCAGTGTAAGGATGACTCTAATCTTTCACTATGGGACGA	TTACACTCGGACCTCGTCGACATGCATTATCTTGTCACTTGCTGGCATTACATCTCTTGC	CCTCCTAAGTTTCGAGCTGGACTCAGTGTCCTTTGGCATTTCTAGCAGAATTAGCTAGCTG
CCTCCTAAGTTTCGAGCTGGACTCAGTGTAGAGGCGTTGATATAAGACACAAAAAGCACAG	TTACACTCGGACCTCGTCGACATGCATTGCTGCACCACTAATTGGAAAGCACTTAAAACC	CCTCCTAAGTTTCGAGCTGGACTCAGTGTCTGACCCTGATAATATCGACACATACTTGCTC
CCTCCTAAGTTTCGAGCTGGACTCAGTGTCCGTACACATGCTATCGATGTAAAAGATCATG	TTACACTCGGACCTCGTCGACATGCATTGTTTGACTACTTCCTCCACCCTACTTCAAATG	CCTCCTAAGTTTCGAGCTGGACTCAGTGTCTGGTGCTGGATTCTGTTATAGAGATTAGGTC
CCTCCTAAGTTTCGAGCTGGACTCAGTGTCCTGCAAAGGCTTAAAAGGTTATCAAAACTCC	TTACACTCGGACCTCGTCGACATGCATTGAGTACCAGTCAGGGAATACTACTTTGATGTG	CCTCCTAAGTTTCGAGCTGGACTCAGTGTCATTCCTCCAACGAGAACATAAGAGCAAGAAG
CCTCCTAAGTTTCGAGCTGGACTCAGTGTGGTTCTATTCCGAATCAAGTGTATGCTCGTAT	TTACACTCGGACCTCGTCGACATGCATTCAGCGATTGTAGCAAGCACCTTAACTTTCAAC	CCTCCTAAGTTTCGAGCTGGACTCAGTGTAGCAGCGAAACATGGATTTCTAAATCCAAGCC
CCTCCTAAGTTTCGAGCTGGACTCAGTGTAGCTTCCCTAGACCATTATTTTTACTCCCAAG	TTACACTCGGACCTCGTCGACATGCATTGGACTTACAGCCCAAAAATCACCATAACTTCC	CCTCCTAAGTTTCGAGCTGGACTCAGTGTCATCCTAAGCTCTCCTCTAGTAAGCTGTTTAG
CCTCCTAAGTTTCGAGCTGGACTCAGTGTCTAAGCGGAAGAAACTCTTATGCTTTCTAACC	TTACACTCGGACCTCGTCGACATGCATTTACCTTCAATGACACCACTTATTTCACAGGGC	CCTCCTAAGTTTCGAGCTGGACTCAGTGTACTCGCACACTCATTCACTAAGAGCATTAGCT
CCTCCTAAGTTTCGAGCTGGACTCAGTGTCTTAGTGCTCACATTGTACGTTAGACATCACA	TTACACTCGGACCTCGTCGACATGCATTGAATACCTGAGGGTACTTAATCGAGTTCAGGT	CCTCCTAAGTTTCGAGCTGGACTCAGTGTAATGTTGCGTTCTAGAGAATTTACAATCGGGG
CCTCCTAAGTTTCGAGCTGGACTCAGTGTGAAAGTAATGGAGGAGGTTTATGCGTAGGTAT	TTACACTCGGACCTCGTCGACATGCATTGAATAGGCTCAGTTCCAGAATGGGAAAAAACC	CCTCCTAAGTTTCGAGCTGGACTCAGTGTTGGTCGAGACACTAAGAAAGAACGAGAGAATT
CCTCCTAAGTTTCGAGCTGGACTCAGTGTGTTTGCATCCACGGCGAGGATATAAATTTTAG	TTACACTCGGACCTCGTCGACATGCATTGGAGGTGCAATGAAAGTAAAGGAACGTTCCTT	CCTCCTAAGTTTCGAGCTGGACTCAGTGTAAATCTTTCTCCAGACGAGATGATGACCAAGT
CCTCCTAAGTTTCGAGCTGGACTCAGTGTATGTAAGATCAAATGCCAGCTGATTTGCTCTC	TTACACTCGGACCTCGTCGACATGCATTTCACTAAATGGACAGCAATTCACTGGCTAACC	CCTCCTAAGTTTCGAGCTGGACTCAGTGTAAAAACATTTGGCACCACGCAGGATAATTAGG
CCTCCTAAGTTTCGAGCTGGACTCAGTGTGCAATGGATTCCATGTGCTTTTTGTCTCTTAG	TTACACTCGGACCTCGTCGACATGCATTCTTTGAGTTAGTCAAACTGCTATCTCCTGGCT	CCTCCTAAGTTTCGAGCTGGACTCAGTGTGTTAGATCAAATGCTAACTGCTCTGCTCTAAC
CCTCCTAAGTTTCGAGCTGGACTCAGTGTGAATAGTTGTACATCAATAAGCTCGATGCTGG	TTACACTCGGACCTCGTCGACATGCATTTTGCTAAACCCCTAAATTCGATGATGCAAGCG	CCTCCTAAGTTTCGAGCTGGACTCAGTGTTATCACGTCGGTAGCGATGGTCTATAATTATC
CCTCCTAAGTTTCGAGCTGGACTCAGTGTCCTTTTCAAAATCACAGTCCTCTGTCATTGGA	TTACACTCGGACCTCGTCGACATGCATTCACATGAAGGACTGTAATTGGGTCTTACTGAC	CCTCCTAAGTTTCGAGCTGGACTCAGTGTAGGTTATTAATCAGATTTTTGCGCTAGTGCGC
CCTCCTAAGTTTCGAGCTGGACTCAGTGTTCACATTTTTCTACGTCAAGTGGCTGGTTTTC	TTACACTCGGACCTCGTCGACATGCATTCTGAAATGTGCATCACAAGCAATTCAGGAGTG	CCTCCTAAGTTTCGAGCTGGACTCAGTGTGGTTCATAATCAAGTTATCAAGGTGCCATTGG
CCTCCTAAGTTTCGAGCTGGACTCAGTGTCTCCTCCACCAGTCATTCAAAATTCCTACTTT	TTACACTCGGACCTCGTCGACATGCATTGTTAGTGCTAGTGTATGGAATTCACCACATGC	CCTCCTAAGTTTCGAGCTGGACTCAGTGTCTCAACCCACCTTTTTATACTCGCAATAACTG
CCTCCTAAGTTTCGAGCTGGACTCAGTGTGCTATCGTTAACCTTAACAAAAGAGAAGGAGG	TTACACTCGGACCTCGTCGACATGCATTGTGGCAAAAAGCACACTGTGTTCATTACAGGT	CCTCCTAAGTTTCGAGCTGGACTCAGTGTCTTCTGTGTGAATAGCAGTTTTAGGTTCTTCC
CCTCCTAAGTTTCGAGCTGGACTCAGTGTGCAACCCTTGGTTTTATATTCAGCCTGATTAC	TTACACTCGGACCTCGTCGACATGCATTGAGTTTCTAATCGCTCAATTGTGCTGGTCTTG	CCTCCTAAGTTTCGAGCTGGACTCAGTGTTTGCATTTAGCTAGCTTAACAAACAGGTGTGG
CCTCCTAAGTTTCGAGCTGGACTCAGTGTGACTGGGTTCTGTCTAATAAGGTAATTGAAGC	TTACACTCGGACCTCGTCGACATGCATTGATAGCACTCCAAGGTATGATGAATCCTTTCG	CCTCCTAAGTTTCGAGCTGGACTCAGTGTTCAGCAAACTTTCCATCTGAATGAAGAGAAGC
CCTCCTAAGTTTCGAGCTGGACTCAGTGTGCTACAATACTAAGCTTCAGGATAGGGTTAGT	TTACACTCGGACCTCGTCGACATGCATTGTAGCTCTAGTAACTGGGACTCCTGCTTTTTT	CCTCCTAAGTTTCGAGCTGGACTCAGTGTATGGCTTCATAACCTTTACTGTGCTTGTATCC
CCTCCTAAGTTTCGAGCTGGACTCAGTGTATAGGTGGAGGTCTTGTTATTGGAGTCAACAA	TTACACTCGGACCTCGTCGACATGCATTGCTTTCGGAATACATGCAACCTTAGAAGGTCT	CCTCCTAAGTTTCGAGCTGGACTCAGTGTCCCGATTGTAAATTCTCTGAAGAGACAATCTG
CCTCCTAAGTTTCGAGCTGGACTCAGTGTGGAGTTTAAGGCCACTGATAATTTCTTGTCTC	TTACACTCGGACCTCGTCGACATGCATTGTAGTTGGTGATACATCACATTGCAGCGATGT	CCTCCTAAGTTTCGAGCTGGACTCAGTGTGCTGATTTTCCACCTTCCAAGTATTTTCCTTG
CCTCCTAAGTTTCGAGCTGGACTCAGTGTGAAAAAGTGAGATTACTGTCAATTCCAGGGAG	TTACACTCGGACCTCGTCGACATGCATTTGATGCACTTCATGCTGGTCATGAACATGATC	CCTCCTAAGTTTCGAGCTGGACTCAGTGTAGGAGCTCATATTGCATTGCTATTTATGTCGC
CCTCCTAAGTTTCGAGCTGGACTCAGTGTTCATGTAGAGTTATGAGCTGTAGGGTTTGAGT	TTACACTCGGACCTCGTCGACATGCATTACTTCTGAGAGGAATGCTTCCCATGATCAATG	CCTCCTAAGTTTCGAGCTGGACTCAGTGTCATGCATGCCGAGAGAAGTAATAAAAGAAAGG
CCTCCTAAGTTTCGAGCTGGACTCAGTGTCATGACTAAACTACAGCCCTCAGATATACTTC	TTACACTCGGACCTCGTCGACATGCATTATGTCTGGAGCTGTAGCTGCTGTAAAAATTGC	CCTCCTAAGTTTCGAGCTGGACTCAGTGTTAACTTCAGGAAGTGTGCGCAATTTATTGCTC
CCTCCTAAGTTTCGAGCTGGACTCAGTGTGTTTGTCCTGATGGAATGAAGCCTGTTTAGTT	TTACACTCGGACCTCGTCGACATGCATTAGAGCTCGTTTATGAGAAGAACGAACTCACCA	CCTCCTAAGTTTCGAGCTGGACTCAGTGTCAACCAACTCTGCCTAAAAGATTTCCAGATTC
CCTCCTAAGTTTCGAGCTGGACTCAGTGTGACAAAACTGGGCCTGAAGAGAATTAAAAGAC	TTACACTCGGACCTCGTCGACATGCATTACCCATAGGATTTCTTGCAGCTTTCATATGGG	CCTCCTAAGTTTCGAGCTGGACTCAGTGTATTCCTCTTGTTGCTTCTTTAGTTCACTGCTG
CCTCCTAAGTTTCGAGCTGGACTCAGTGTAGCTCTTCCTGCATTTGAAATATTCCCAACCA	TTACACTCGGACCTCGTCGACATGCATTCCGAGATTGTCATTGTAGGGATCGATTGCTTT	CCTCCTAAGTTTCGAGCTGGACTCAGTGTTCGTATGGAATTCCAGTCAGTTAAACTCTTGC
CCTCCTAAGTTTCGAGCTGGACTCAGTGTATAGCTAGATAGAGATAGCTGTGAGCTTACAC	TTACACTCGGACCTCGTCGACATGCATTACGGAATACCTGTTCCTAGCTCATTGGTTGAA	CCTCCTAAGTTTCGAGCTGGACTCAGTGTAAGCGATATAGGTTAGATGTGTCCTAGGTTTC
CCTCCTAAGTTTCGAGCTGGACTCAGTGTGTTGTATTATCTACGAAATCCTTGGTACGAGC	TTACACTCGGACCTCGTCGACATGCATTCATTAACAGGAGTATCAATTGGTCTACCGAGG	CCTCCTAAGTTTCGAGCTGGACTCAGTGTCGATTTCAAAATGTGGCCAAACAAGGGTAGTT
CCTCCTAAGTTTCGAGCTGGACTCAGTGTTTGTTGAGTGGAGAGAGAATTTATAATCGGGG	TTACACTCGGACCTCGTCGACATGCATTGGTAAGTCTAACAAGGACCACGTTCTTTAAGC	CCTCCTAAGTTTCGAGCTGGACTCAGTGTGTGCAGCAAATTCTTAAGAGTATAGTCAAGGG
CCTCCTAAGTTTCGAGCTGGACTCAGTGTGCAATAACTGGCATGCAATGATATCTCGTAAC	TTACACTCGGACCTCGTCGACATGCATTCTCTGCTTAGAGCTTCAACTATTTCTCTGCAG	CCTCCTAAGTTTCGAGCTGGACTCAGTGTGGTGAGCGACTGGTAAGAAATCTACAAATAAG
CCTCCTAAGTTTCGAGCTGGACTCAGTGTTTGATTAGCTGTGGCTAATTATGACAGAGGAG	TTACACTCGGACCTCGTCGACATGCATTAGCAAGATAACAAGCAAAGACCTCAACGTCCT	CCTCCTAAGTTTCGAGCTGGACTCAGTGTACTCTTGAGAGAATCAATCCACTCTTTGGATC
CCTCCTAAGTTTCGAGCTGGACTCAGTGTACAAAGAGCATCAATAGATTCCTCTCCTAGCA	TTACACTCGGACCTCGTCGACATGCATTCAGCATTCCTGTCAGCATTTGCTCCTTATTAG	CCTCCTAAGTTTCGAGCTGGACTCAGTGTTTCCAATAAGAGGGTACTGTTGAAGAGTGCAA
CCTCCTAAGTTTCGAGCTGGACTCAGTGTTCCAGATTTTATAGGCTGATAGGTAGTTCTCC	TTACACTCGGACCTCGTCGACATGCATTCATGCTGAATACTAAACTCAGAATCCTCCCTC	CCTCCTAAGTTTCGAGCTGGACTCAGTGTAATCTTTCTTCCCTCATCTTGATTTGCAGCCA
CCTCCTAAGTTTCGAGCTGGACTCAGTGTGAGCCCTTTAGCAAAGAAGAGCTTCTTCATAA	TTACACTCGGACCTCGTCGACATGCATTGCACCACATTATAAAACGACAGCTTCAGGTCT	CCTCCTAAGTTTCGAGCTGGACTCAGTGTCCGCACCAAGAATTTCAAGCTAATCCATATTC
CCTCCTAAGTTTCGAGCTGGACTCAGTGTGGTTCTCCAATCTATTATTCCAAAGGCATCAC	TTACACTCGGACCTCGTCGACATGCATTCTTAACTGACAGAGTCATGACTTGCTCATTCC	CCTCCTAAGTTTCGAGCTGGACTCAGTGTATATATAATAGATATCTACGACCGAGGCCCAC
CCTCCTAAGTTTCGAGCTGGACTCAGTGTCAAAGGGATTCAAAGGTGGATATGAGCTTCTT	TTACACTCGGACCTCGTCGACATGCATTAGAGCCTCCCTCTCAATTTACAACCTAACTCT	CCTCCTAAGTTTCGAGCTGGACTCAGTGTGTCATAATCACCAGAGTCTTTCTAAGTGCTTC
CCTCCTAAGTTTCGAGCTGGACTCAGTGTCCGAATACAGATCAGTCAAACTCTTGATTGAG	TTACACTCGGACCTCGTCGACATGCATTCATTTCTATAGTGCAAGTATCTCTCAGCGACC	CCTCCTAAGTTTCGAGCTGGACTCAGTGTGGCGTTGTTGATCTATCAGAGAATTCAGAAGA
CCTCCTAAGTTTCGAGCTGGACTCAGTGTGGTATGATAATAGAACACAGAAGGAACTCCCA	TTACACTCGGACCTCGTCGACATGCATTGCCTTGGTACTTATACTACTATGGCTCCAGAA	CCTCCTAAGTTTCGAGCTGGACTCAGTGTGAAATCATCTAAGCAGCGACAGAAACAAGATG
CCTCCTAAGTTTCGAGCTGGACTCAGTGTTCTGCTTGAAGCTTGAAAGAAACCTTATGGTG	TTACACTCGGACCTCGTCGACATGCATTGCTCTGACTTTTCTTGCACAGAAATGCTTCTC	CCTCCTAAGTTTCGAGCTGGACTCAGTGTGGCGGAATACAAATTCTCTACTGATTTTCAGC
CCTCCTAAGTTTCGAGCTGGACTCAGTGTGCTGCTTATCTCTAGAATCAACATCTTCACTC	TTACACTCGGACCTCGTCGACATGCATTTGCAAGTCTACAAGCAGAATGAACAACAGGCA	CCTCCTAAGTTTCGAGCTGGACTCAGTGTCCTATGCGAGGGTAATAATTTCTCAGAAGAGA
CCTCCTAAGTTTCGAGCTGGACTCAGTGTCAACTCCGCTCCCGCCATTTAATAAATAAGAT	TTACACTCGGACCTCGTCGACATGCATTGCTACCTCTGTCTACAGACTTGCTTCTTTTGA	CCTCCTAAGTTTCGAGCTGGACTCAGTGTTGAGTCTAATATGCTGATTTAGCGTGGTGACA
CCTCCTAAGTTTCGAGCTGGACTCAGTGTAGAGTTTTTTAAATTGCCCTCCAGGCGAAATG	TTACACTCGGACCTCGTCGACATGCATTGCTCATAGCACCTAGGACTTTCTACAGAGATA	CCTCCTAAGTTTCGAGCTGGACTCAGTGTTCGTCTTCTTCATCAAGCTCTAAGGTAGGTTT
CCTCCTAAGTTTCGAGCTGGACTCAGTGTGGGCTCTGCTTAAGAACAAAGTAAGTAAGAGA	TTACACTCGGACCTCGTCGACATGCATTTCTCCTCTACATGTCGAAGCTAGGAAGAAATC	CCTCCTAAGTTTCGAGCTGGACTCAGTGTGGTCACTACCTTCACAACAAAAGAAAGCTATG
CCTCCTAAGTTTCGAGCTGGACTCAGTGTTGCTAGTCCTTATTTAGCTTCTTCATGGTCTG	TTACACTCGGACCTCGTCGACATGCATTGGCTTCATTTCTCAAGCAAATTGGTAGCCATG	CCTCCTAAGTTTCGAGCTGGACTCAGTGTTGTATTGTTGGTGAGCAGTAGGTTATACTCCT
CCTCCTAAGTTTCGAGCTGGACTCAGTGTAAAGGGATGGTGTTCTCTATGAAACGTTCATG	TTACACTCGGACCTCGTCGACATGCATTATGCTTGTTACTTCCGAAGGAGTTTGATCCTG	CCTCCTAAGTTTCGAGCTGGACTCAGTGTAGGCTAACCTTTGAAGCCTAATTTCGTGTAAG
CCTCCTAAGTTTCGAGCTGGACTCAGTGTGCTGCTTTAAGGCACTTTTACACCCTTTTTTG	TTACACTCGGACCTCGTCGACATGCATTGCTGCTGCCATATAACCCTTAATGATTCCAAC	CCTCCTAAGTTTCGAGCTGGACTCAGTGTCACACCTTCCCTACTTCTTGTTTTTACACCTT
CCTCCTAAGTTTCGAGCTGGACTCAGTGTAATCTTCTGCATATGCCTTTAGGAAGCACTTG	TTACACTCGGACCTCGTCGACATGCATTACATCTGGAGTCACACTTCGACTATTCTTACC	CCTCCTAAGTTTCGAGCTGGACTCAGTGTAATCAAGAGCACCATCTAGAAACTTCTCTCAG
CCTCCTAAGTTTCGAGCTGGACTCAGTGTCTTATACTTGATATGTCAAAGCAGCTTGAGCC	TTACACTCGGACCTCGTCGACATGCATTAGAGCAGCTAATCAGTTTCCCCATTAAGACAG	CCTCCTAAGTTTCGAGCTGGACTCAGTGTCTCCCAATAGATGGAAGAAAGATGATGTGACT
CCTCCTAAGTTTCGAGCTGGACTCAGTGTTTCGGCTGCAACTATAAGCACATATGTACCAT	TTACACTCGGACCTCGTCGACATGCATTCAGGTGAGTCTGTTTTTTCTCTTTCGAAGCTC	CCTCCTAAGTTTCGAGCTGGACTCAGTGTGAAATCAAGCTTCATGCTCATCCATTTTCTGC
CCTCCTAAGTTTCGAGCTGGACTCAGTGTGGATGAGCAATTTAGATGTGGTTTCTACCAGT	TTACACTCGGACCTCGTCGACATGCATTTCCCACCAAACCACCCAATGAATCACCAATAT	CCTCCTAAGTTTCGAGCTGGACTCAGTGTTGGGGAATTTGACTAGATTATAGATGATCCCC
CCTCCTAAGTTTCGAGCTGGACTCAGTGTCAGATCTCTCTAGCTTAATTCCTTCAGCATTC	TTACACTCGGACCTCGTCGACATGCATTCTGGCTAGAGGAGAATCATTACTGTAAAGGAG	CCTCCTAAGTTTCGAGCTGGACTCAGTGTTTCTTTGAGAGAGTTGTCTTCAAGGAAGGAAG
CCTCCTAAGTTTCGAGCTGGACTCAGTGTACCTCGATAAGAAAATTTTCCTAGCTTCCAGG	TTACACTCGGACCTCGTCGACATGCATTGAGTAGCGAAGTCAACCAAAGAAGCTCTTTAG	CCTCCTAAGTTTCGAGCTGGACTCAGTGTCCATCAACTTTGAGCAATCCAAACTCATTGAG
CCTCCTAAGTTTCGAGCTGGACTCAGTGTGTGTATTGGTGAAAAGACAATTGCCATCTCTG	TTACACTCGGACCTCGTCGACATGCATTGTTGTTGCTGTTGTAGCTGAATGTCTGTCTTC	CCTCCTAAGTTTCGAGCTGGACTCAGTGTAGCAGAATTTCTTAGCCTCCTTCTAAAGCTTC
CCTCCTAAGTTTCGAGCTGGACTCAGTGTGGATTAACAAATAGAGGAATGTTTGTGCCACC	TTACACTCGGACCTCGTCGACATGCATTCGATCAATAACTCCCACTCTCAGAAATCATGC	CCTCCTAAGTTTCGAGCTGGACTCAGTGTCACTAGTTACTGACAATAGTTAGTCTTCGTCG
CCTCCTAAGTTTCGAGCTGGACTCAGTGTTGGACTTGATAGAAGAAGTAGCTCTAAGTGAC	TTACACTCGGACCTCGTCGACATGCATTGGTCACCATTCCACCATTCTATGAATTCGGTA	CCTCCTAAGTTTCGAGCTGGACTCAGTGTGCGCTGGTTTTATTATAAAACCAAACAGAGGC
CCTCCTAAGTTTCGAGCTGGACTCAGTGTCTGTTCACCCTTTTCGGCTATCATATATTCCA	TTACACTCGGACCTCGTCGACATGCATTTTTAGTTTCAGGGTCATCCATGATTACTCCCC	CCTCCTAAGTTTCGAGCTGGACTCAGTGTCAGTAAAATAGCTCCAGGGGTTTTATGTTCCA
CCTCCTAAGTTTCGAGCTGGACTCAGTGTTATTCTTCAACCTATTGAGGGTGCCATAACAG	TTACACTCGGACCTCGTCGACATGCATTGCTACTCACTCTGCCCAAAATTTACAAGGCTT	CCTCCTAAGTTTCGAGCTGGACTCAGTGTATATTTCTTAAGTAGACCTCATGGAGGCCTAC
CCTCCTAAGTTTCGAGCTGGACTCAGTGTCTTGTTGGAGTATCTATGTAAATACCCCTGGT	TTACACTCGGACCTCGTCGACATGCATTTGGGGGGCACATTACAAGCATTTTTAATCGCA	CCTCCTAAGTTTCGAGCTGGACTCAGTGTACATTTTTAGTTTAACCCTTTGAGCAGGGGGT
CCTCCTAAGTTTCGAGCTGGACTCAGTGTTAGCTGTTCCTGCATCTGAAATATCAAGGACT	TTACACTCGGACCTCGTCGACATGCATTCCACTGCTAAATTCAGTTATGTCCGTGAACTG	CCTCCTAAGTTTCGAGCTGGACTCAGTGTGGTCTACTATGTTGAATAGACAACTAGGAGTC
CCTCCTAAGTTTCGAGCTGGACTCAGTGTCACTGTGGAGGTTTATGTATTGGTTTGTCAAC	TTACACTCGGACCTCGTCGACATGCATTCATGGCACGCTAAACAATATGGAATGCTGCAA	CCTCCTAAGTTTCGAGCTGGACTCAGTGTGCTCACATCTGCTATCATCTATTCTTCTCTTC
CCTCCTAAGTTTCGAGCTGGACTCAGTGTTGTTACTTTTGTCCTTCGAATTTTTTGCGGCC	TTACACTCGGACCTCGTCGACATGCATTGTGCAATCGTAGATGAAAGTGAATCAGTGTGC	CCTCCTAAGTTTCGAGCTGGACTCAGTGTCCAGAGTAAGGTTTTCTCTAGCAACTACTCTA
CCTCCTAAGTTTCGAGCTGGACTCAGTGTGTAGTTGATTGTAAAATCCGAGGCTACAAGTC	TTACACTCGGACCTCGTCGACATGCATTGGCATCGTCTTGATAGCCATACATTCCTTTAC	CCTCCTAAGTTTCGAGCTGGACTCAGTGTTACGATATAGTCATACTCGCACGGATACGTAT
CCTCCTAAGTTTCGAGCTGGACTCAGTGTCAGTTAATGTCAACGTGTTGAAAGCGATAAGG	TTACACTCGGACCTCGTCGACATGCATTACAACATGGTATTGTTTGCTTTGCTTGCCCAC	CCTCCTAAGTTTCGAGCTGGACTCAGTGTTAGCACTAATACTAGAATCAGCAATTCCCCCA
CCTCCTAAGTTTCGAGCTGGACTCAGTGTGGGGGTTTTTGAAATTTTTGGCATGCTAGTTC	TTACACTCGGACCTCGTCGACATGCATTACCATGTTTTCAATAGCTTCTGCACAAAGCCC	CCTCCTAAGTTTCGAGCTGGACTCAGTGTCTGATAGGTAGGGAGACTTATACTCCATTTCT
CCTCCTAAGTTTCGAGCTGGACTCAGTGTTGGCTATTTCTTTCCTGTAAGCAAGAATGGGA	TTACACTCGGACCTCGTCGACATGCATTCCTAAACCCTTTGCATTGAGTGCTAAAAAGGC	CCTCCTAAGTTTCGAGCTGGACTCAGTGTAGCGCATAGAAGAATTATGAGAGAGTTCTCCA
CCTCCTAAGTTTCGAGCTGGACTCAGTGTAGTATTTGTGCTGCAGAGAGCCTTTTGATAGT	TTACACTCGGACCTCGTCGACATGCATTACTTCCTAGAGTGTTACTTACAGTCTATGGGG	CCTCCTAAGTTTCGAGCTGGACTCAGTGTGTGGACTAATAATCACTCAACTCCGCTTTTTC
CCTCCTAAGTTTCGAGCTGGACTCAGTGTTTTGATTGGCAAGCATGTATGTGTGCTTATGC	TTACACTCGGACCTCGTCGACATGCATTGGGGAGATGTAAGGATATGATGTACTTCTTGG	CCTCCTAAGTTTCGAGCTGGACTCAGTGTGGTATTAAGGAGTGTTTAGTGATTCCTAGCAG
CCTCCTAAGTTTCGAGCTGGACTCAGTGTCAAATCAGCACTTATAGCACTGATAAGGCTAC	TTACACTCGGACCTCGTCGACATGCATTAATAGAATGGCTGAGGAGAAGAAAATGCACGC	CCTCCTAAGTTTCGAGCTGGACTCAGTGTCCATACTTAGGTTCACTATACCAATGGAGTGA
CCTCCTAAGTTTCGAGCTGGACTCAGTGTCAGTACCTATGAATATTGTCCCAATACCTGAG	TTACACTCGGACCTCGTCGACATGCATTTGCCAACTACTTGCTTGAAAGTTTCCCTAACG	CCTCCTAAGTTTCGAGCTGGACTCAGTGTCGGATGGACTCATAAATAGGTTGATTCCAATC
CCTCCTAAGTTTCGAGCTGGACTCAGTGTCAGCAATGATTCCTGATGTCATTATGGGCATA	TTACACTCGGACCTCGTCGACATGCATTCTTATCCGTCGAGTAATAAAACTCTGCCCATG	CCTCCTAAGTTTCGAGCTGGACTCAGTGTCATCTGCAATCAGATGGGGTATTTCTGTTAGT
CCTCCTAAGTTTCGAGCTGGACTCAGTGTCTCGATCCAGATCAAGATCAATATCAAGATCG	TTACACTCGGACCTCGTCGACATGCATTGTTAGTTCACAGAGAAAAGACTCCCTTCCAAG	CCTCCTAAGTTTCGAGCTGGACTCAGTGTCCATCTCGTCAATGATTTCATAGGATGTCTAG
CCTCCTAAGTTTCGAGCTGGACTCAGTGTCTTGTATCCATCAGCATCATGTTCGAAAACAG	TTACACTCGGACCTCGTCGACATGCATTTCCTTCCATTTGCAAGCCACTTTCCCAAATCA	CCTCCTAAGTTTCGAGCTGGACTCAGTGTAGACGTAGCTTACGCCTAGTGGTAAATTACAT
CCTCCTAAGTTTCGAGCTGGACTCAGTGTGCAAGTGCTTATCACAAGGCTATAATTACCCT	TTACACTCGGACCTCGTCGACATGCATTTGCACTACTGGAGTATCAGCCTTATGTTCTAC	CCTCCTAAGTTTCGAGCTGGACTCAGTGTGCTGCTTCTATTCTACATCGAAAACTGTCATC
CCTCCTAAGTTTCGAGCTGGACTCAGTGTTTCCTCGCCTGGTTACTTTTTAATAGGCTTGA	TTACACTCGGACCTCGTCGACATGCATTGCTAGAGCAGTACCTAAGCCAAATTCTCCTTT	CCTCCTAAGTTTCGAGCTGGACTCAGTGTGTCAGTTAGGTGGGTCTTCAAGCAATACTTTA
CCTCCTAAGTTTCGAGCTGGACTCAGTGTCAGAATTAAGCAGCTAGGCCTTCGTTAAAACT	TTACACTCGGACCTCGTCGACATGCATTAGTTGTTAAGGAGCATCAGTTCTAGGTTCTGC	CCTCCTAAGTTTCGAGCTGGACTCAGTGTGCAGTAAAGATGTCTTTAGCTATGAGGTACCT
CCTCCTAAGTTTCGAGCTGGACTCAGTGTCTAAGTACTCATTTGGATGGTGTTTAGCAAGC	TTACACTCGGACCTCGTCGACATGCATTCCTTATATCCAGACTCCTTCCCTTTCTTATCC	CCTCCTAAGTTTCGAGCTGGACTCAGTGTGGTACGTCTTTCCTTCTTATCAAGCCTTTTCT
CCTCCTAAGTTTCGAGCTGGACTCAGTGTCCTAAAAATCATCACCAAGAGCTTCCTCAAAG	TTACACTCGGACCTCGTCGACATGCATTGGCCAGATGGAAAAATATACAGAGGAAACTGG	CCTCCTAAGTTTCGAGCTGGACTCAGTGTTACAAAAGGTCTTGTAGTCCTCAGTCACAAGA
CCTCCTAAGTTTCGAGCTGGACTCAGTGTGAGCCTTCAAAGGTCTTTCAGTTAATGAAGCA	TTACACTCGGACCTCGTCGACATGCATTACCACTCTCCTTCATACTTTGCTCCATCACTA	CCTCCTAAGTTTCGAGCTGGACTCAGTGTCATGAAATATCTCGTGTTTGCTTGCAGACTCT
CCTCCTAAGTTTCGAGCTGGACTCAGTGTAGGCACTTGTCTGAATCAAAATAGGAGAGATC	TTACACTCGGACCTCGTCGACATGCATTACTTCTGCTAGTAAGATGGCTTACGGAAATGG	CCTCCTAAGTTTCGAGCTGGACTCAGTGTTCCTCTTTACTGACCAACTCACCATCAATATC
CCTCCTAAGTTTCGAGCTGGACTCAGTGTCTCAACAATAGGGATCTTTCCAGGTCTCTTTA	TTACACTCGGACCTCGTCGACATGCATTGTTCCTTAAGAATGCTGGGTATTTGTACACCC	CCTCCTAAGTTTCGAGCTGGACTCAGTGTTATTTCTCTCATGCTGCTGTATCTCTTGATGC
CCTCCTAAGTTTCGAGCTGGACTCAGTGTAGACACTCATATACAAAGCTACGTTATGAGGG	TTACACTCGGACCTCGTCGACATGCATTGAGAAGTAGGCTGACCACTGATTTATTCAGAG	CCTCCTAAGTTTCGAGCTGGACTCAGTGTAGTATCTTAAAGGAAGCTACCTGTAATGCCTC
CCTCCTAAGTTTCGAGCTGGACTCAGTGTTGGGGAAGATTGCACAGGAATTGGATATTTCT	TTACACTCGGACCTCGTCGACATGCATTACACTAGCTTCTCAAAAAGTGCAGCTGAAACC	CCTCCTAAGTTTCGAGCTGGACTCAGTGTCCTGAACCTAAGGATCATAATATTCCACCTAG
CCTCCTAAGTTTCGAGCTGGACTCAGTGTTAGGCCACATAAATTATGGTCAATGTGATGCC	TTACACTCGGACCTCGTCGACATGCATTCTGCTCTGTGATGGCATCTATTGAATCAAGCT	CCTCCTAAGTTTCGAGCTGGACTCAGTGTAGTGTTTAGTGTTCGTCAAATCTGTAGGAAGG
